1  
2  
3  
4  
5  
6  
7  
8  
9  
10  
11  
12  
13  
14  
15  
16  
17  
18  
19  
20  
21  
22  
23  
24  
25  
26  
27  
28  
29  
30  
31  
32  
33  
34  
35  
36  
37  
38  
39  
40  
41  
42  
43  
44  
45  
46

## **Rapalogs downmodulate intrinsic immunity and promote cell entry of SARS-CoV-2**

Guoli Shi<sup>1</sup>, Abhilash I. Chiramel<sup>2</sup>, Tiansheng Li<sup>3</sup>, Kin Kui Lai<sup>1</sup>, Adam D. Kenney<sup>4</sup>, Ashley Zani<sup>4</sup>,  
Adrian Eddy<sup>4</sup>, Saliha Majdoul<sup>1</sup>, Lizhi Zhang<sup>4</sup>, Tirhas Dempsey<sup>1</sup>, Paul A. Beare<sup>5</sup>, Swagata Kar<sup>6</sup>,  
Jonathan W. Yewdell<sup>3</sup>, Sonja M. Best<sup>2</sup>, Jacob S. Yount<sup>4</sup>, Alex A. Compton<sup>1,\*</sup>

<sup>1</sup>HIV Dynamics and Replication Program, Center for Cancer Research, National Cancer Institute, Frederick, MD, USA

<sup>2</sup>Laboratory of Virology, Rocky Mountain Laboratories, National Institute of Allergy and Infectious Diseases, Hamilton, MT, USA

<sup>3</sup>Laboratory of Viral Diseases, National Institute of Allergy and Infectious Diseases, Bethesda, MD, USA

<sup>4</sup>Department of Microbial Infection and Immunity, The Ohio State University, Columbus, OH, USA

<sup>5</sup>Laboratory of Bacteriology, Rocky Mountain Laboratories, National Institute of Allergy and Infectious Diseases, Hamilton, MT, USA

<sup>6</sup>Bioqual, Rockville, MD, USA

\* Address correspondence to [alex.compton@nih.gov](mailto:alex.compton@nih.gov)  
1050 Boyles St., Frederick, MD 21702 USA  
+1 (301)-846-7144

Running title: Rapalogs promote cell entry of SARS-CoV-2

Keywords: rapamycin, rapalog, mTOR inhibitor, IFITM, interferon, SARS-CoV-2, TFEB, microautophagy, COVID-19, coronavirus, membrane fusion

47

48

## 49 **Abstract**

50

51 SARS-CoV-2 infection in immunocompromised individuals is associated with prolonged virus  
52 shedding and evolution of viral variants. Rapamycin and its analogs (rapalogs, including  
53 everolimus, temsirolimus, and ridaforolimus) are FDA-approved as mTOR inhibitors for the  
54 treatment of human diseases, including cancer and autoimmunity. Rapalog use is commonly  
55 associated with increased susceptibility to infection, which has been traditionally explained by  
56 impaired adaptive immunity. Here, we show that exposure to rapalogs increases susceptibility to  
57 SARS-CoV-2 infection in tissue culture and in immunologically naive rodents by antagonizing  
58 the cell-intrinsic immune response. By identifying one rapalog (ridaforolimus) that is less potent  
59 in this regard, we demonstrate that rapalogs promote Spike-mediated entry into cells by  
60 triggering the degradation of antiviral proteins IFITM2 and IFITM3 via an endolysosomal  
61 remodeling program called microautophagy. Rapalogs that increase virus entry inhibit the  
62 mTOR-mediated phosphorylation of the transcription factor TFEB, which facilitates its nuclear  
63 translocation and triggers microautophagy. In rodent models of infection, injection of rapamycin  
64 prior to and after virus exposure resulted in elevated SARS-CoV-2 replication and exacerbated  
65 viral disease, while ridaforolimus had milder effects. Overall, our findings indicate that  
66 preexisting use of certain rapalogs may elevate host susceptibility to SARS-CoV-2 infection and  
67 disease by activating lysosome-mediated suppression of intrinsic immunity.

68

## 69 **Significance**

70

71 Rapamycin is an immunosuppressant used in humans to treat cancer, autoimmunity, and other  
72 disease states. Here, we show that rapamycin and related compounds promote the first step of the  
73 SARS-CoV-2 infection cycle—entry into cells—by disarming cell-intrinsic immune defenses.  
74 We outline the molecular basis for this effect by identifying a rapamycin derivative that is  
75 inactive, laying the foundation for improved mTOR inhibitors that do not suppress intrinsic  
76 immunity. We find that rapamycin analogs that promote SARS-CoV-2 entry are those that  
77 activate TFEB, a transcription factor that triggers the degradation of antiviral membrane proteins  
78 inside of cells. Finally, rapamycin administration to rodents prior to SARS-CoV-2 challenge  
79 results in enhanced viral disease, revealing that its use in humans may increase susceptibility to  
80 infection.

81

## 82 **Introduction**

83

84 Severe acute respiratory syndrome coronavirus 2 (SARS-CoV-2) emerged in humans in  
85 2019 following a species jump from bats and is the cause of COVID-19, a respiratory and multi-  
86 organ disease of variable severity (1, 2). The characterization of virus-host interactions that  
87 dictate SARS-CoV-2 infection and COVID-19 severity is a major priority for public health (3).  
88 Immune impairment, such as that resulting from cancer, has been associated with prolonged  
89 SARS-CoV-2 shedding, the seeding of “super-spreader” events, and the evolution of viral  
90 variants (4-8).

91 One group of compounds being considered for the treatment of COVID-19-related  
92 immunopathology are rapamycin (sirolimus, Rapamune) and rapamycin analogs (rapalogs) (9-

93 20). As Food and Drug Administration-approved inhibitors of mammalian target of rapamycin  
94 (mTOR) kinase, these macrolide compounds are used therapeutically to inhibit the processes of  
95 cancer, autoimmunity, graft versus host disease, atherosclerosis, and aging (21). Rapalogs,  
96 including everolimus (RAD-001), temsirolimus (Torisel, CCI-779), and ridaforolimus  
97 (deforolimus, AP-23573), were developed to decrease the half-life of rapamycin in vivo in order  
98 to minimize the systemic immunosuppression caused by rapamycin use, which is associated with  
99 increased susceptibility to infections (22-26). Differing by only a single functional group at  
100 carbon-40 (**Figure 1**), it is believed that rapamycin and rapalogs share the same molecular  
101 mechanism of action to inhibit mTOR kinase—they bind to FK506-binding proteins (FKBP) and  
102 the resulting complex physically interacts with mTOR and disrupts its signaling (25, 27).

103 Activation of mTOR promotes cell growth, cell proliferation, and cell survival (28). In  
104 addition, mTOR activation promotes pro-inflammatory T-cell differentiation and mTOR  
105 inhibitors have been used to block lymphocyte proliferation and cytokine storm (29). Since  
106 respiratory virus infections like SARS-CoV-2 can cause disease by provoking hyper-  
107 inflammatory immune responses that result in immunopathology (30-32), rapalogs are being  
108 tested as treatments to decrease viral disease burden. At least three active clinical trials have been  
109 designed to test the impact of rapamycin on COVID-19 severity in infected patients  
110 (NCT04461340, NCT04341675, NCT04371640).

111 In addition to their potential utility for mitigating disease in individuals already infected  
112 by SARS-CoV-2, there are also calls to use rapalogs as antiviral agents to inhibit virus infection  
113 itself (i.e. as a prophylactic) (33). It was recently shown that rapalogs inhibit SARS-CoV-2  
114 replication when added to cells post-infection (34), attesting to a potential use of rapalogs as  
115 antivirals in infected individuals. Nonetheless, rapalogs are known to induce an  
116 immunosuppressed state in humans characterized by an increased rate of infections, including  
117 those caused by respiratory viruses. Furthermore, rapamycin administration concurrent with  
118 virus challenge has been shown to promote Influenza A replication in mice and to exacerbate  
119 viral disease (35, 36), but the mechanism was unknown. We previously found that exposure of  
120 human and murine cells to rapamycin induced the lysosomal degradation of a select group of  
121 cellular proteins, including the interferon-inducible transmembrane (IFITM) proteins, and  
122 rendered cells more permissive to infection by Influenza A virus and gene-delivering lentiviral  
123 vectors (37, 38). IFITM1, IFITM2, and IFITM3 are expressed constitutively in a variety of  
124 tissues, are further upregulated by type-I, type-II, and type-III interferons, and are important  
125 components of cell-intrinsic immunity, the antiviral network that defends individual cells against  
126 virus invasion (39, 40). Nonetheless, it remained to be determined how rapamycin-mediated  
127 regulation of intrinsic immunity impacts host susceptibility to virus infection in vivo.

128 In this report, we show that rapalogs differentially counteract the constitutive and  
129 interferon-induced antiviral state in lung cells and increase permissiveness to SARS-CoV-2  
130 infection. We found that the enhancing effect of rapalogs on SARS-CoV-2 infection is  
131 functionally linked to their capacity to trigger degradation of IFITM proteins, particularly  
132 IFITM2 and IFITM3. By identifying a rapalog that lacks this activity, we found that IFITM  
133 protein turnover and SARS-CoV-2 infection enhancement are associated with activation of  
134 TFEB, a master regulator of lysosome function that is regulated by mTOR. Administration of  
135 rapamycin to naive rodents four hours prior to experimental SARS-CoV-2 infection increased  
136 virus replication and viral disease severity, indicating for the first time that suppression of  
137 intrinsic immunity by rapamycin contributes to its immunosuppressive properties in vivo.

138

139 **Results**

140

141 **Select rapalogs promote SARS-CoV-2 infection and downmodulate IFITM proteins in lung**  
142 **cells**

143

144 To assess how rapamycin and rapalogs impact SARS-CoV-2 infection, we took  
145 advantage of a pseudovirus system based on human immunodeficiency virus (HIV). This  
146 pseudovirus (HIV-CoV-2) is limited to a single round of infection, cell entry is mediated by  
147 SARS-CoV-2 Spike, and infection of target cells is measured by luciferase activity. SARS-CoV-  
148 2 can enter cells via multiple routes, and sequential proteolytic processing of Spike is essential to  
149 this process. SARS-CoV-2 Spike is cleaved at a polybasic motif (RRAR) located at the S1/S2  
150 boundary by furin-like proteases in virus-producing cells prior to release. Subsequently, the S2'  
151 site is cleaved by the trypsin-like protease TMPRSS2 on the target cell surface or by cathepsins  
152 B and L in target cell endosomes, triggering membrane fusion at those sites (41-43).

153 We previously found that a four-hour pre-treatment of cells with 20  $\mu$ M quantities of  
154 rapamycin triggered the degradation of human IFITM3 and enhanced cellular susceptibility to  
155 Influenza A virus infection (38). Therefore, we pre-treated A549-ACE2 (transformed human  
156 lung epithelial cells that overexpress the SARS-CoV-2 receptor, human ACE2) with 20  $\mu$ M  
157 rapamycin, everolimus, temsirolimus, ridaforolimus, or DMSO (vehicle control) for four hours  
158 and then challenged cells with HIV-CoV-2. Interestingly, we found that rapalogs promoted  
159 Spike-mediated infection to different extents: rapamycin, everolimus, and temsirolimus  
160 significantly enhanced infection (up to 5-fold) while ridaforolimus did not (**Figure 2A**). To  
161 determine whether rapalogs promote cell permissiveness to infection by upregulating  
162 dependency factors or by downregulating restriction factors, we performed the same experiment  
163 in cells pre-treated with type-I interferon. While type-I interferon suppressed infection by  
164 approximately 90%, the addition of rapamycin, everolimus, and temsirolimus resulted in rescue  
165 of infection by up to 20-fold (**Figure 2A**). As a result, infection levels were partially restored to  
166 those achieved in the absence of interferon, with everolimus having the greatest boosting effect  
167 and ridaforolimus, the least. These results indicate that rapalogs differentially promote SARS-  
168 CoV-2 Spike-mediated infection by counteracting intrinsic antiviral defenses in lung cells to  
169 different extents.

170 Type-I interferon treatment of A549-ACE2 cells resulted in upregulation of IFITM2 and  
171 IFITM3, as detected by an antibody recognizing both proteins in whole cell lysates (**Figure 2B**).  
172 A549-ACE2 cells express low but detectable levels of IFITM2/3 in the absence of interferon  
173 treatment (**Supplemental Figure 1A**). Consistent with our previous publication, addition of  
174 rapamycin resulted in substantial loss of IFITM2/3 protein levels from cells. In a manner that  
175 mirrored the differential effects of rapalogs on pseudovirus infection, everolimus and  
176 temsirolimus greatly diminished IFITM2/3 levels while ridaforolimus reduced IFITM2/3 to a  
177 lesser extent (**Figure 2B and Supplemental Figure 1A**). In contrast, ACE2 levels were not  
178 affected by interferon nor by rapalog treatment. Therefore, rapamycin derivatives may facilitate  
179 infection by antagonizing constituents of intrinsic immunity, including IFITM2/3, and this  
180 activity is determined by the chemical moiety found at carbon-40 of the macrolide structure.

181 To extend our findings to primary lung cells, we performed similar experiments in human  
182 small airway epithelial cells (HSAEC). While these cells were not permissive to HIV-CoV-2,  
183 they were susceptible to infection by pseudovirus based on vesicular stomatitis virus (VSV-CoV-  
184 2) whereby infection is reported by GFP expression. Pre-treatment of HSAEC with rapalogs

185 enhanced VSV-CoV-2 infection to varying extents, but as observed in A549-ACE2 cells,  
186 everolimus exhibited the greatest effect and ridaforolimus, the least. Endogenous IFITM3 was  
187 readily detected in HSAEC under basal conditions (in the absence of interferon) and its levels  
188 were downmodulated differentially by rapalogs. However, IFITM1 was barely detected and  
189 IFITM2 was not detected at all. (**Supplemental Figure 1B**). siRNA-mediated knockdown of  
190 IFITM3 in HSAEC resulted in enhanced VSV-CoV-2 infection, indicating that IFITM3 restricts  
191 Spike-mediated infection in these cells (**Supplemental Figure 1C**). We also treated transformed  
192 nasal epithelial cells (UNCNN2TS) with rapalogs in order to assess an impact on endogenous  
193 IFITM3 levels. As observed in HSAEC, downmodulation of IFITM3 occurred following  
194 treatment of UNCNN2TS with rapamycin, everolimus, temsirolimus, and to a lesser extent,  
195 ridaforolimus (**Supplemental Figure 1D**).

196 Since 20  $\mu$ M quantities of rapalogs promoted pseudovirus infection mediated by SARS-  
197 CoV-2 Spike, we tested how pretreatment of A549-ACE2 cells with varying amounts of  
198 everolimus impacted infection by replication-competent SARS-CoV-2. We observed a dose-  
199 dependent enhancement of infectious SARS-CoV-2 yield in supernatants of infected cells (up to  
200 4-fold) (**Figure 2D**). Therefore, everolimus boosts pseudovirus infection and SARS-CoV-2  
201 infection to similar extents, and since Spike is the only viral component shared between the two  
202 sources of infection, cellular entry is the infection stage inhibited by the intrinsic defenses that  
203 are sensitive to downmodulation by rapalogs.

204

### 205 **Rapalogs facilitate cell entry mediated by various viral fusion proteins**

206

207 In order to gain a greater mechanistic understanding of the effects of rapalogs on SARS-  
208 CoV-2 infection, we took advantage of HeLa cells overexpressing ACE2 (HeLa-ACE2). HeLa-  
209 ACE2 were pre-treated for four hours with increasing amounts of everolimus and then  
210 challenged with SARS-CoV-2. Everolimus increased titers of infectious virus released into  
211 supernatants in a dose-dependent manner, and to a greater extent than was observed for A549-  
212 ACE2 cells (**Figure 3A**). Furthermore, we found that pre-treatment of cells with 20  $\mu$ M amounts  
213 of rapalogs enhanced SARS-CoV-2 titers to varying extents—rapamycin, everolimus, and  
214 temsirolimus significantly boosted SARS-CoV-2 infection (up to 10-fold), while ridaforolimus  
215 had less of an impact (**Figure 3B**). We also performed infections of HeLa-ACE2 with HIV-CoV-  
216 2 pseudovirus, and the results were similar: the impact of ridaforolimus was minimal while the  
217 other three compounds significantly boosted Spike-mediated infection (**Figure 3C**). To test the  
218 link between infection enhancement and downmodulation of IFITM proteins by rapalogs, we  
219 probed for levels of IFITM3, IFITM2, and IFITM1 by immunoblotting whole cell lysates using  
220 specific antibodies. All IFITM proteins were readily detected in HeLa-ACE2 in the absence of  
221 interferon. IFITM3, IFITM2, and IFITM1 were significantly downmodulated following  
222 treatment with rapamycin, everolimus, and temsirolimus (**Figure 3D**). Levels of IFITM3 were  
223 quantified over multiple experiments and presented as an average. The results show that all  
224 rapalogs led to significant decreases in IFITM3 protein, but ridaforolimus was least potent in this  
225 regard (**Figure 3E**). The loss of IFITM2/3 protein was confirmed by confocal  
226 immunofluorescence microscopy of intact cells (**Figure 3F**). Furthermore, prolonged treatment  
227 (24 hours) of cells with everolimus and temsirolimus resulted in prolonged suppression of  
228 IFITM2 and IFITM3 protein levels (**Supplemental Figure 2A**). In contrast, ACE2 levels and  
229 ACE2 subcellular distribution were unaffected by rapalog treatment (**Figure 3D and**

230 **Supplemental Figure 2B**). Furthermore, rapalogs did not significantly decrease cell viability  
231 under the conditions tested (**Supplemental Figure 2C**).

232 We previously showed that lysosomal degradation of IFITM3 triggered by rapamycin  
233 requires endosomal complexes required for transport (ESCRT) machinery and multivesicular  
234 body (MVB)-lysosome fusion (38). We confirmed that depletion of IFITM proteins by rapalogs  
235 occurs at the post-translational level and requires endolysosomal acidification, since bafilomycin  
236 A1 prevented their loss (**Supplemental Figure 3A-B**). The process by which rapalogs trigger  
237 IFITM protein degradation resembles endolysosomal microautophagy, an autophagy pathway  
238 that does not require an autophagosome intermediate (44-46). Treatment of cells with U18666A,  
239 an inhibitor of MVB formation and microautophagy, mostly prevented IFITM3 turnover in the  
240 presence of rapalogs (**Supplementary Figure 3B**). In contrast, a selective inhibitor of  
241 vps34/PI3KC3 (essential for macroautophagy induction) did not (**Supplemental Figure 3C-D**).  
242 Therefore, rapamycin and specific rapalogs trigger the degradation of endogenous factors  
243 mediating intrinsic resistance to SARS-CoV-2 infection, including the IFITM proteins, by  
244 promoting their turnover in lysosomes via endolysosomal microautophagy.

245 Enveloped virus entry into cells is a concerted process involving virus attachment to the  
246 cell surface followed by fusion of cellular and viral membranes. Since IFITM proteins are known  
247 to inhibit virus-cell membrane fusion, we quantified the terminal stage of HIV-CoV-2 entry by  
248 tracking the cytosolic delivery of beta-lactamase (BlaM) in single cells. We found that treatment  
249 of cells with rapamycin, everolimus, and temsirolimus resulted in enhanced HIV-CoV-2 entry  
250 while ridaforolimus was less impactful (**Figure 4A**). To measure whether rapalogs promote the  
251 cell entry process driven by other coronavirus Spike proteins, we produced HIV incorporating  
252 Spike from SARS-CoV (HIV-CoV-1) or MERS-CoV (HIV-MERS-CoV). Infections by both  
253 HIV-CoV-1 and HIV-MERS-CoV were elevated by rapalog treatment in HeLa-ACE2 and HeLa-  
254 DPP4 cells, respectively, although the extent of enhancement was lower than that observed with  
255 HIV-CoV-2 (**Figure 4B-C**). Consistently, ridaforolimus was the least active among the rapalogs  
256 tested and it did not significantly promote pseudovirus infection. Since we previously showed  
257 that rapamycin enhanced the cellular entry of Influenza A virus and VSV-G pseudotyped  
258 lentiviral vectors (38), we also assessed infection of pseudoviruses incorporating hemagglutinin  
259 (HIV-HA) or VSV G (HIV-VSV G). Rapamycin, everolimus, and especially temsirolimus  
260 boosted HA- and VSV G-mediated infections (up to 30-fold and 11-fold, respectively) (**Figure**  
261 **4D-E**). Since IFITM proteins have been previously shown to inhibit infection by SARS-CoV,  
262 MERS-CoV, VSV, and Influenza A virus (40), these data suggest that rapalogs promote  
263 infection, at least in part, by lowering the barrier to virus entry imposed by IFITM proteins.

## 264 265 **IFITM2/3 mediate the rapalog-sensitive barrier to SARS-CoV-2 infection in HeLa-ACE2**

266  
267 To formally test the link between rapalog-mediated depletion of IFITM proteins and  
268 entry by SARS-CoV-2 Spike, we used HeLa cells in which IFITM1, IFITM2, and IFITM3 were  
269 knocked out (*IFITM1-3* KO) and introduced human ACE2 by transient transfection (**Figure 5A**).  
270 IFITM2 alone or IFITM2 and IFITM3 were restored in *IFITM1-3* KO cells by transient  
271 overexpression (**Figure 5B**) and cells were challenged with HIV-CoV-2. Relative to WT cells,  
272 HIV-CoV-2 infection was approximately 50-fold higher in *IFITM1-3* KO cells, indicating that  
273 endogenous IFITM proteins restrict SARS-CoV-2 Spike-mediated infection in this cell type.  
274 Furthermore, while temsirolimus significantly promoted infection by 10-fold in WT cells, little  
275 to no enhancement was observed in *IFITM1-3* KO cells (**Figure 5C**). Ectopic expression of

276 IFITM2 inhibited infection and partially restored sensitivity to temsirolimus, while the  
277 combination of IFITM2 and IFITM3 restricted infection further and fully restored temsirolimus  
278 sensitivity. These findings indicate that temsirolimus promotes Spike-mediated infection in  
279 HeLa-ACE2 cells by lowering levels of endogenous IFITM2 and IFITM3. In accordance with  
280 the role played by endosomal IFITM2/3 in protecting cells against SARS-CoV-2 infection (47),  
281 pseudovirus infection mediated by Omicron (BA.1) Spike (which favors the endosomal route for  
282 entry ((48)) was as sensitive to temsirolimus-mediated enhancement as infection mediated by  
283 ancestral (WA1) Spike (**Figure 5D**). These results suggest that select rapalogs promote SARS-  
284 CoV-2 infection by negating the antiviral action of IFITM2/3 in endosomes.

285 Since human IFITM proteins have been reported to promote SARS-CoV-2 infection in  
286 certain cell types, including the lung epithelial cell line Calu-3 (49), we tested the impact of  
287 rapalogs on HIV-CoV-2 infection in this cell type. Here, in contrast to the enhancement observed  
288 in A549-ACE2 and HeLa-ACE2 cells, rapamycin, everolimus, and temsirolimus inhibited Spike-  
289 mediated infection in Calu-3 cells while ridaforolimus did not (**Supplemental Figure 4A**).  
290 Furthermore, rapamycin, everolimus, and temsirolimus reduced IFITM3 protein in this cell line,  
291 but ridaforolimus had a negligible effect (**Supplemental Figure 4B**). These results support that  
292 the effect of rapalog treatment on Spike-mediated infection is explained by their ability to induce  
293 the degradation of IFITM proteins, which inhibit SARS-CoV-2 infection in most contexts but  
294 enhance SARS-CoV-2 infection in Calu-3 cells for unknown reasons.

295

### 296 **Rapalogs differentially activate a lysosomal degradation pathway orchestrated by TFEB**

297

298 Since rapamycin and rapalogs are known to inhibit mTOR signaling by binding both  
299 mTOR and FKBP12 (and other FKBP members), we sought to determine whether mTOR  
300 binding and its inhibition are required for rapalog-mediated enhancement of SARS-CoV-2  
301 infection. To that end, we tested the effect of tacrolimus (also known as FK506), a macrolide  
302 immunosuppressant that is chemically related to rapalogs but does not bind nor inhibit mTOR.  
303 Instead, tacrolimus forms a ternary complex with FKBP12 and calcineurin to inhibit the  
304 signaling properties of the latter (50). In HeLa-ACE2 cells, a four-hour treatment of 20  $\mu$ M  
305 tacrolimus did not reduce levels of IFITM2/3 (**Supplemental Figure 5A**), nor did it boost HIV-  
306 CoV-2 infection (**Supplemental Figure 5B**). These results suggest that FKBP12 binding is not  
307 sufficient for drug-mediated enhancement of SARS-CoV-2 infection. They also suggest that the  
308 extent to which mTOR is inhibited may explain the differential degree to which infection is  
309 impacted by the immunosuppressants examined in this study. Therefore, we surveyed the  
310 phosphorylation status of TFEB, a transcription factor that controls lysosome biogenesis and  
311 degradative processes carried out by lysosomes (51). mTOR phosphorylates TFEB at serine 211  
312 (S211), which promotes its sequestration in the cell cytoplasm and decreases its translocation  
313 into the nucleus (51-53). Furthermore, this phosphorylation event was previously shown to be  
314 sensitive to inhibition by rapamycin and temsirolimus (52, 54). We found that rapamycin,  
315 everolimus, and temsirolimus significantly reduced S211 phosphorylation of endogenous TFEB  
316 in A549-ACE2 cells while ridaforolimus did so to a lesser extent (**Figure 6A-B**). Furthermore,  
317 we measured the subcellular distribution of TFEB-GFP in HeLa-ACE2 treated with different  
318 compounds and found that rapamycin, everolimus, and temsirolimus induced a significantly  
319 greater accumulation of TFEB-GFP in the nucleus (**Figure 6C-D**). Therefore, nuclear  
320 translocation of TFEB is associated with IFITM2/3 degradation and increased cellular  
321 susceptibility to SARS-CoV-2 Spike-mediated infection.

322 We confirmed that 20  $\mu$ M ridaforolimus did not inhibit S211 phosphorylation of TFEB in  
323 HeLa-ACE2 cells, while the same concentration of temsirolimus did (**Supplemental Figure 6A-**  
324 **B**). To better understand why ridaforolimus displayed less activity with regards to enhancing  
325 SARS-CoV-2 infection and inhibiting TFEB phosphorylation, we treated cells with increasing  
326 concentrations of ridaforolimus. Interestingly, we found that 30  $\mu$ M ridaforolimus boosted  
327 infection to a similar extent as 20  $\mu$ M temsirolimus, and 50  $\mu$ M ridaforolimus boosted even  
328 further (**Supplemental Figure 6C**). Further cementing the link between infection enhancement  
329 and nuclear translocation of TFEB, we found that elevated concentrations of ridaforolimus which  
330 resulted in increased infection were also sufficient to inhibit TFEB phosphorylation  
331 (**Supplemental Figure 6D**). These findings indicate that, compared to other rapalogs,  
332 ridaforolimus is a less potent inhibitor of mTOR-mediated phosphorylation of TFEB, which may  
333 have important implications for the clinical use of ridaforolimus as an mTOR inhibitor in  
334 humans.

335 Consistent with a direct relationship between TFEB activation, IFITM2/3 turnover, and  
336 Spike-mediated cell entry, we found that ectopic expression of a constitutively active form of  
337 TFEB lacking the first 30 amino-terminal residues (51) was sufficient to trigger IFITM2/3 loss  
338 from cells (**Figure 6E**) and sufficient to increase susceptibility to HIV-CoV-2 infection (**Figure**  
339 **6F**). By combining transfection of the constitutively active form of TFEB with temsirolimus  
340 treatment, we found that IFITM2/3 levels were strongly suppressed irrespective of whether  
341 TFEB was detected or not. This confirms that TFEB and rapalogs are functionally redundant and  
342 operate in the same pathway to negatively regulate IFITM2/3 levels (**Supplemental Figure 7A**).  
343 Finally, we took advantage of TFEB-deficient cells to formally address the role that TFEB  
344 activation plays during rapalog-mediated enhancement of infection (**Supplemental Figure 7B**).  
345 While rapamycin, everolimus, and temsirolimus significantly boosted HIV-CoV-2 infection in  
346 HeLa WT cells transfected with ACE2, no significant enhancement was observed in HeLa *TFEB*  
347 KO cells (**Figure 6G**). In summary, our results employing functionally divergent rapalogs reveal  
348 a previously unrecognized immunoregulatory role played by the mTOR-TFEB-lysosome axis  
349 that affects the cell entry of SARS-CoV-2 and other viruses.

### 350 351 **Rapamycin enhances SARS-CoV-2 replication in primary human nasal epithelia and** 352 **promotes viral disease in animal models**

353  
354 Our findings from SARS-CoV-2 and pseudovirus infection of human cells demonstrate  
355 that rapamycin, everolimus, and temsirolimus can suppress intrinsic immunity at the post-  
356 translational level, while ridaforolimus exhibits decreased potency in this regard. However,  
357 whether these compounds are functionally divergent when administered in vivo was unclear. To  
358 closely approximate the conditions under which SARS-CoV-2 infects and replicates within the  
359 human respiratory tract, we tested how rapamycin or ridaforolimus impacted SARS-CoV-2  
360 replication in primary human nasal epithelial cells cultured at the liquid-air interface, a tissue  
361 model that recapitulates the 3D physiology of the upper airway. Measurement of viral *ORF1a*  
362 RNA by RT-qPCR was used to assess levels of viral transcripts at 24 and 48 hours post-  
363 infection, while *IL6* and *IFNBI* RNA were measured to assess the concomitant induction of  
364 cytokines. Levels of *ORF1a* significantly increased from 24 to 48 hours post-infection,  
365 suggesting that these cells support virus replication (**Figure 7A**). Furthermore, we found that  
366 rapamycin significantly enhanced virus replication (400-fold) at 48 hours post-infection, while  
367 ridaforolimus did not (**Figure 7A**). Consistent with enhanced virus replication in those cells, *IL6*



368 and *IFNBI* transcripts were significantly elevated by rapamycin (**Figure 7B-C**). However, since  
369 rapamycin elevated viral *ORF1a* by 400-fold but only increased cellular *IL6* and *IFNBI* by 2.5-  
370 fold or less, these results suggest that rapamycin increases cellular susceptibility to SARS-CoV-2  
371 infection while limiting inflammatory cytokine induction in response to infection.

372 Based on these findings, we next tested how intraperitoneal injection of rapamycin or  
373 ridaforolimus impacted SARS-CoV-2 replication and disease course in naive hamsters (**Figure**  
374 **8A**). Hamsters are a permissive model for SARS-CoV-2 because hamster ACE2 is sufficiently  
375 similar to human ACE2 to support productive infection. Furthermore, hamsters exhibit severe  
376 disease characterized by lung pathology when high viral loads are achieved (55). Eight hamsters  
377 were randomly allocated to each treatment group (rapamycin, ridaforolimus, or DMSO) and all  
378 received an intraperitoneal injection (3 mg/kg) 4 hours prior to intranasal inoculation with  
379 SARS-CoV-2 WA1. Furthermore, half of the hamsters in each group received a second injection  
380 on day 2 post-infection. As an indicator of viral disease, we tracked weight loss for 10 days, or  
381 less if the hamster met requirements for euthanasia (loss of 20% or more of its body weight or  
382 signs of respiratory distress such as agonal breathing). We observed that hamsters receiving two  
383 injections did not exhibit significantly different rates of weight loss compared to those receiving  
384 a single injection (**Supplemental Figure 8A**). As a result, we consolidated hamsters into three  
385 groups of eight according to receipt of rapamycin, ridaforolimus, or DMSO. In addition to  
386 monitoring weight and breathing over the course of infection, disease scores (referred to as  
387 ‘COVID scores’) were generated daily for each hamster. Scoring reflected the extent of coat  
388 ruffling, hunched posture, lethargic state, and weight loss, and mean scores were compiled for  
389 each group. In agreement with the increased occurrence of morbidity necessitating euthanasia  
390 (**Figure 8B**), disease scores were higher on average for rapamycin- and ridaforolimus-treated  
391 hamsters relative to DMSO (**Supplemental Figure 8B and Supplemental Table 1**). Between  
392 days 6 and 8 post-infection, one (1/8) of the hamsters treated with DMSO exhibited severe  
393 morbidity necessitating euthanasia, while seven (7/8) of the hamsters treated with rapamycin did  
394 (**Figure 8B-C**). Meanwhile, four (4/8) of the hamsters treated with ridaforolimus met  
395 requirements for euthanasia. Survivors in all three groups recovered weight after day 7 post-  
396 infection and infectious virus was not detected from the lungs of these hamsters at day 10  
397 (**Figure 8D**). Overall, hamsters treated with rapamycin exhibited significantly reduced survival  
398 compared to the DMSO group, while survival of ridaforolimus-treated animals was decreased  
399 but did not differ significantly (**Figure 8C**).

400 Lungs were harvested from infected hamsters following euthanasia either at the end of  
401 the experiment (for survivors) or earlier (for hamsters exhibiting morbidity and necessitating  
402 humane euthanasia). In contrast, the lungs of hamsters euthanized due to morbidity exhibited  
403 high infectious virus titers, suggesting that morbidity was caused by viral pathogenesis (the lungs  
404 of one hamster treated with rapamycin were not examined because it was found dead following  
405 infection) (**Figure 8D**). In general, hamsters treated with rapamycin exhibited significantly  
406 higher infectious virus titers in lungs than those treated with ridaforolimus (**Figure 8D**). In  
407 addition, early SARS-CoV-2 replication was measured by quantitative PCR from oral swabs. We  
408 found that hamsters injected with rapamycin exhibited significantly higher viral RNA levels in  
409 the oral cavity at day 2 post-infection compared to animals injected with DMSO (**Figure 8E**). In  
410 contrast, viral RNA levels in hamsters injected with ridaforolimus were elevated relative to the  
411 DMSO group, but they did not differ significantly. Consistent with the known inhibitory effects  
412 of rapamycin on cytokine signaling (29), we detected significantly less IL-6 protein in lungs of  
413 hamsters treated with rapamycin, while ridaforolimus did not cause a reduction in IL-6 (**Figure**

414 **8F)**. Overall, these results demonstrate that rapamycin administration increases host  
415 susceptibility to SARS-CoV-2 infection and significantly increases virus-induced morbidity in a  
416 manner that is not associated with an enhanced pro-inflammatory state.

417 These conclusions were supported by histopathological analysis of lungs, which indicated  
418 that lung damage was observed in all infected hamsters, especially those that needed to be  
419 humanely euthanized. All hamsters, regardless of treatment group, exhibited signs of lung  
420 hyperplasia and mixed or mononuclear inflammation, while some hamsters exhibited lung  
421 edema, hypertrophy, fibrosis, or syncytial cell formation. Hamsters requiring euthanasia,  
422 regardless of treatment group, showed the additional signs of moderate to severe lung  
423 hemorrhage, while minor hemorrhaging was apparent in only two hamsters that survived until  
424 day 10 post-infection (**Supplemental Table 1 and Appendix**). Since the highest viral loads in  
425 lungs were observed in morbid hamsters (**Figure 8D**), lung dysfunction (acute respiratory  
426 distress syndrome) caused by virus replication is the likely cause of morbidity in hamsters. This  
427 is further supported by instances of agonal breathing in some of the infected hamsters, which  
428 necessitated euthanasia (**Supplemental Table 1**).

429 Rapamycin was previously shown to promote morbidity of Influenza A infection in mice  
430 (36, 56). Moreover, we previously found that murine IFITM3 is sensitive to depletion by  
431 rapamycin (38). To determine whether rapamycin promotes host susceptibility to SARS-CoV-2  
432 infection in mice, we injected C57BL/6 mice with rapamycin or DMSO prior to and after  
433 challenge with mouse-adapted (MA) SARS-CoV-2 (**Figure 9A**). In this model, significant  
434 weight loss was not observed for up to five days following infection (**Supplemental Figure 8C**).  
435 Lungs from mice in both groups were harvested uniformly on day 2 post-infection, and we found  
436 that virus titers were significantly increased (144-fold) in rapamycin-treated mice compared to  
437 DMSO-treated mice (**Figure 9B**). As observed in hamsters, IL-6 levels were significantly  
438 reduced in lungs from rapamycin-treated mice despite enhanced virus titers (**Figure 9C**).  
439 Furthermore, murine IFITM3 protein levels were reduced in the lungs of mice injected with  
440 rapamycin compared to levels found in DMSO-treated mice (**Figure 9D**). Together, these  
441 findings support the conclusion that rapamycin downmodulates cell-intrinsic barriers to SARS-  
442 CoV-2 infection in vivo, and as a result, enhances virus replication and viral disease.

443

## 444 **Discussion**

445

446 By assessing their impact on infection at the single-cell and whole-organism level, we  
447 draw attention to an immunosuppressive property of rapamycin and some rapalogs that acts on  
448 cell-intrinsic immunity and increases cellular susceptibility to infection by SARS-CoV-2 and  
449 likely other pathogenic viruses. Side effects of rapalog use in humans, including increased risk of  
450 respiratory tract infections, are regularly attributed to immunosuppression of adaptive immunity  
451 (57). Indeed, rapalogs have been used to mitigate systemic immunopathology caused by T-cell  
452 responses, and this is one reason why they are being tested for therapeutic benefit in COVID-19  
453 patients. However, since rapamycin was injected into immunologically naive hosts prior to and  
454 soon after virus challenge and followed for no more than 10 days, it is unlikely that rapalogs  
455 modulated adaptive immunity against SARS-CoV-2 in our experiments. While  
456 immunomodulation of adaptive immunity by rapalogs may provide benefit for patients already  
457 suffering from COVID-19, pre-existing rapalog use may enhance host susceptibility to infection  
458 and disease by counteracting cell-intrinsic immunity.

459 The injection dose of rapamycin or ridaforolimus (3 mg/kg) that we administered to  
460 hamsters and mice, when adjusted for body surface area and an average human weight of 60 kg  
461 (58), equates to approximately 15 mg per human. This figure is similar to those administered to  
462 humans in clinical settings, such as the use of rapamycin for the treatment of glioblastoma (up to  
463 10 mg daily for multiple days), the use of temsirolimus for the treatment of renal cell carcinoma  
464 (25 mg once weekly), or the use of everolimus for the treatment of tuberous sclerosis (TS), a  
465 genetic disorder resulting in hyperactivation of mTOR (10 mg daily, continuously) (23, 59-61).  
466 Interestingly, a case report detailed the deaths of two TS patients (a father and daughter) who,  
467 despite discontinuing everolimus upon detection of SARS-CoV-2 infection, died from severe  
468 COVID-19 in late 2020 (61). Our findings detailing the suppression of cell-intrinsic immunity by  
469 rapalogs raise the possibility that their use may predispose individuals to SARS-CoV-2 infection  
470 and severe forms of COVID-19. More generally, they provide new insight into how rapamycin  
471 and rapalogs may elicit unintended immunocompromised states and increase human  
472 susceptibility to multiple virus infections.

473 By leveraging the differential functional properties of rapalogs, we reveal how the  
474 mTOR-TFEB-lysosome axis impacts intrinsic resistance to SARS-CoV-2 infection. Specifically,  
475 rapamycin and select rapalogs (everolimus and temsirolimus) promote infection at the stage of  
476 cell entry, and this is functionally linked to nuclear accumulation of TFEB and the lysosomal  
477 degradation of IFITM proteins by endolysosomal microautophagy (**Figure 10**). While mTOR  
478 phosphorylates TFEB at S211 to promote the sequestration of TFEB in the cytoplasm, the  
479 phosphatase calcineurin dephosphorylates TFEB at this position to promote nuclear translocation  
480 (62). Therefore, the extent to which different rapalogs promote nuclear TFEB accumulation may  
481 be a consequence of differential mTOR inhibition and/or differential calcineurin activation.  
482 Calcineurin is activated by calcium release through the lysosomal calcium channel TRPML1  
483 (also known as mucolipin-1) (62), and interestingly, it was shown that rapamycin and  
484 temsirolimus, but not ridaforolimus, promote calcium release by TRPML1 (54). Therefore, it is  
485 worth examining whether TRPML1 or related lysosomal calcium channels are required for the  
486 effects of rapalogs on virus infection. Overall, our findings reveal a previously unrecognized  
487 mechanism by which TFEB promotes virus infections—inhibition of cell-intrinsic defenses  
488 restricting virus entry. We show that nuclear TFEB induces the degradation of IFITM proteins,  
489 but it may also trigger the loss or relocalization of other antiviral factors that remain to be  
490 uncovered. Furthermore, TFEB-mediated induction of dependency factors, such as cathepsin L,  
491 is likely to partially contribute to the overall impact of rapalogs on SARS-CoV-2 infection.  
492 Overall, this work identifies TFEB as a therapeutic target, and inhibitors that limit levels of  
493 nuclear TFEB could be mobilized for broad-spectrum antiviral activity.

494 We previously demonstrated that treatment of cells with micromolar quantities of  
495 rapamycin induced the lysosomal degradation of IFITM2/3 via a pathway that is independent of  
496 macroautophagy yet dependent upon endosomal complexes required for transport (ESCRT)-  
497 mediated sorting of IFITM2/3 into intraluminal vesicles of late endosomes/MVB (38). This  
498 MVB-mediated degradation pathway is also referred to as microautophagy, which occurs  
499 directly on endosomal or lysosomal membranes and involves membrane invagination (63). In  
500 both yeast and mammalian cells, microautophagy is characterized by ESCRT-dependent sorting  
501 of endolysosomal membrane proteins into intraluminal vesicles followed by their degradation by  
502 lysosomal hydrolases (64). While microautophagy selectively targets ubiquitinated  
503 endolysosomal membrane proteins, cytosolic proteins can also be non-selectively internalized  
504 into intraluminal vesicles and degraded (65, 66). Interestingly, microautophagy is known to be

505 regulated by mTOR (67, 68), and mTOR inhibition triggers a ubiquitin- and ESCRT-dependent  
506 turnover of vacuolar (lysosomal) membrane proteins in yeast (69, 70). Overall, our findings  
507 suggest that select rapalogs induce a rapid, TFEB-dependent, endolysosomal membrane  
508 remodeling program known as microautophagy, and IFITM proteins are among the client  
509 proteins subjected to this pathway. The full cast of cellular factors that orchestrate this selective  
510 degradation program in mammalian cells and the other client proteins subjected to it will need to  
511 be worked out. Interestingly, the E3 ubiquitin ligase NEDD4 was previously shown to  
512 ubiquitinate IFITM2 and IFITM3 and to induce their lysosomal degradation in mammalian cells  
513 (71, 72), while Rsp5, the yeast ortholog of NEDD4, was shown to ubiquitinate vacuolar proteins  
514 turned over by microautophagy in yeast (73). Therefore, rapamycin and select rapalogs may  
515 upregulate NEDD4 function, resulting in selective degradation of a subset of the cellular  
516 proteome that includes IFITM proteins. Indeed, NEDD4 and the related NEDD4L are among the  
517 known target genes regulated by TFEB (74).

518 The relationship between IFITM proteins and human coronaviruses is complex. It was  
519 previously shown that IFITM3 facilitates replication of the seasonal coronavirus hCoV-OC43  
520 (75), while we and others recently showed that SARS-CoV-1 and SARS-CoV-2 infection is  
521 inhibited by ectopic and endogenous IFITM1, IFITM2, and IFITM3 from mice and humans (47,  
522 76-79). Intriguingly, mutants of human IFITM3 that lack the capacity to internalize into  
523 endosomes lost antiviral activity and promoted SARS-CoV-2 and MERS-CoV infection,  
524 revealing that IFITM3 can either inhibit or enhance infection depending on its subcellular  
525 localization (47, 80). Furthermore, one study reported that endogenous human IFITM proteins  
526 promoted infection by SARS-CoV-2 in certain human tissues, possibly by acting as interaction  
527 partners and docking platforms for viral Spike (81). Overall, the net effect of human IFITM  
528 proteins on SARS-CoV-2 infection in vivo remains unclear. However, the impact of rapamycin  
529 in our experimental SARS-CoV-2 infections of hamsters and mice suggests that rapamycin-  
530 mediated loss of IFITM proteins favors virus infection and viral disease, consistent with IFITM  
531 proteins performing antiviral roles against SARS-CoV-2 in those species. Accordingly, it was  
532 recently demonstrated that mouse IFITM3 protects mice from viral pathogenesis following MA  
533 SARS-CoV-2 infection (82).

534 Other lines of evidence support an antiviral role for IFITM proteins during SARS-CoV-2  
535 infection in humans. While SARS-CoV-2 infection has been shown to cause deficiencies in  
536 interferon synthesis and interferon response pathways, administration of type I interferon in vivo  
537 promotes SARS-CoV-2 clearance in hamsters and humans (83). Notably, IFITM3 is among the  
538 most highly induced genes in primary human lung epithelial cells exposed to SARS-CoV-2 (84,  
539 85), and humans experiencing mild or moderate COVID-19 showed elevated induction of  
540 antiviral genes, including *IFITM1* and *IFITM3*, in airway epithelium compared to individuals  
541 suffering from more severe COVID-19 (86). Single nucleotide polymorphisms in human *IFITM3*  
542 known as ns12252 and rs34481144, which lead to IFITM3 loss-of-function, have been associated  
543 with severe outcomes following Influenza A virus infection as well as severe COVID-19 (87,  
544 88). These data suggest that cell-intrinsic immunity in airways plays a role in restricting virus  
545 spread and constraining systemic pathology during infection. Therefore, downmodulation of  
546 IFITM proteins by select rapalogs may contribute to the immunocompromised state that these  
547 drugs are well known to elicit in humans. This possibility warrants the close examination of  
548 different rapalog regimens on respiratory virus acquisition and disease in humans.

549  
550 **Methods**

551

## 552 **Cell lines, cell culture, inhibitors, and cytokines**

553

554 HEK293T (CRL-3216) and Calu-3 (HTB-55) cells were obtained from ATCC. HeLa-ACE2,  
555 HeLa-DPP4, and A549-ACE2 cell lines were produced by transducing cells with lentivirus  
556 packaging pWPI encoding ACE2 or DPP4 and selecting with blasticidin. HeLa IFITM1/2/3  
557 Knockout (C5-9) cells were purchased from ATCC (CRL-3452). HeLa *TFEB* KO cells were  
558 kindly provided by Ramnik J. Xavier (Broad Institute) and were described in (89). Primary  
559 human small airway (lung) epithelial cells (HSAEC) were purchased from ATCC (PCS-301-  
560 010). The partially immortalized nasal epithelial cell line (UNCNN2TS) was kindly provided by  
561 Scott H. Randell (University of North Carolina School of Medicine). Vero E6 cells (NR-53726)  
562 were obtained from BEI Resources. Vero-TMPRSS2 cells were a kind gift from Shan-Lu Liu  
563 (The Ohio State University). All cells were cultured at 37°C with 5% CO<sub>2</sub> in Dulbecco's  
564 Modified Eagle Medium (DMEM) supplemented with 10% fetal bovine serum (HyClone,  
565 Cytiva), except for UNCNN2TS, which were cultured in EpiX Medium (Propagenix), and  
566 HSAEC, which were cultured with airway epithelial cell basal medium (ATCC, PCS-300-030)  
567 and the bronchial epithelial cell growth kit (ATCC, PCS-300-040). Primary human nasal airway  
568 epithelial cells (hNAEC) cultured at the air-liquid interface were obtained from Epithelix  
569 (EP02MP, MucilAir Pool of Donors) and cultured according to the provider's instructions using  
570 MucilAir culture medium. Rapamycin (553211) was obtained from Sigma. Everolimus (S1120),  
571 temsirolimus (S1044), ridaforolimus (S5003), tacrolimus (S5003), and SAR405 (S7682) were  
572 obtained from Selleckchem. U18666A (U3633) and Bafilomycin A1 (SML1661) were obtained  
573 from Sigma. Type-I interferon (human recombinant interferon-beta<sub>ser17</sub>, NR-3085) was obtained  
574 from BEI Resources.

575

## 576 **Plasmids and RNA interference**

577

578 pcDNA3.1 encoding human ACE2 was kindly provided by Thomas Gallagher (Loyola  
579 University). pcDNA3.1 encoding CoV-1 Spike or CoV-2 Spike (WA1) tagged with a C9 epitope  
580 on the C-terminus, or MERS Spike, was kindly provided by Thomas Gallagher (Loyola  
581 University). pcDNA3.1 encoding CoV-1 Spike or CoV-2 Spike (WA1) tagged with a FLAG  
582 epitope on the C-terminus was obtained from Michael Letko and Vincent Munster (NIAID).  
583 pcDNA3.1 encoding CoV-2 Omicron (BA.1) Spike tagged with a His epitope on the N-terminus  
584 was synthesized provided by Genscript. pMD2.G encoding VSV-G (12259) was obtained from  
585 Addgene (a generous gift from Didier Trono). pWPI was obtained from Addgene (12254) and  
586 human ACE2 or human TMPRSS2 was introduced by Gateway cloning (Gateway LR Clonase II  
587 Enzyme mix (11791020)) as per manufacturer's instructions. pPolII encoding hemagglutinin  
588 (HA) or neuraminidase (NA) from Influenza A/Turkey/1/2005 (H5N1) were kindly provided by  
589 Richard Yi Tsun Kao (The University of Hong Kong). pCMV encoding HIV-1 Vpr fused to beta  
590 lactamase (pCMV4-BlaM-Vpr) was obtained from Addgene (21950). A plasmid encoding  
591 replication-incompetent HIV-1 lacking *env* and *vpr* and encoding luciferase (pNL4-3LucR-E-)  
592 was kindly provided by Vineet KewalRamani (National Cancer Institute). A plasmid encoding  
593 replication-incompetent HIV-1 lacking *env* (pNL4-3E-) was kindly provided by Olivier Schwartz  
594 (Institut Pasteur). pEGFP-N1-TFEB (38119) and pEGF-N1-Δ30TFEB (44445) were obtained  
595 from Addgene (a generous gift of Shawn M. Ferguson). pEGFP-2xFYVE (140047) was obtained  
596 from Addgene (a gift from Harald Stenmark). Silencer Select siRNA targeting IFITM3

597 (s195035) and a non-targeting control (No. 1) was obtained from Ambion. Cells were transfected  
598 with 20 nM siRNA using Opti-MEM (Gibco) and Lipofectamine RNAiMAX (Thermo Fisher).  
599

## 600 **Virus and pseudovirus infections**

601  
602 SARS-CoV-2 isolate USA-WA1/2020 (MN985325.1) was provided by the Centers for Disease  
603 Control or by BEI Resources (NR-52281). Virus propagation was performed in Vero E6 cells.  
604 Mouse-adapted (MA) SARS-CoV-2 variant MA10 (in the USA-WA1/2020 backbone) (90) was  
605 obtained from BEI Resources (NR-55329). Virus propagation was performed in Vero E6 cells  
606 and subsequently in Vero-TMPRSS2 cells. Virus was sequenced to ensure lack of tissue culture  
607 adaptations, including furin cleavage site mutations. Virus titers were calculated by plaque assay  
608 performed in Vero E6 cells as follows: serial 10-fold dilutions were added to Vero E6  
609 monolayers in 48-well plates for 1 hour at 37°C. Cells were overlaid with 1.5% carboxymethyl  
610 cellulose (Sigma) in modified Eagle's medium containing 3% fetal bovine serum (Gibco), 1 mM  
611 L-glutamine, 50 units per mL penicillin and 50 µg per mL streptomycin. Three days post-  
612 infection, cells were fixed in 10% formalin and stained with crystal violet to visualize and count  
613 plaques as previously described (91). Titers were calculated as plaque forming units per mL and  
614 normalized as described in the figure captions. HIV-based pseudovirus was produced by  
615 transfecting HEK293T cells with 12 µg of pNL4-3LucR-E- and 4 µg of plasmid encoding viral  
616 glycoproteins (pcDNA3.1 Spike (CoV-1, CoV-2 WA1, CoV-2 Omicron/BA.1, or MERS-CoV),  
617 pMD2.G-VSV-G, or 2 µg of pPol1II-HA and 2 µg of pPol1II-NA) using TransIT-293 (Mirus).  
618 Virus supernatant was harvested 72 hours post-transfection and filtered through 0.22 µm filters.  
619 Pseudovirus titers were determined by p24 ELISA (XpressBio) and 100 ng p24 equivalent was  
620 added to target cells and incubated for 72 hours prior to lysis with Passive Lysis Buffer  
621 (Promega). Luciferase activity was measured using the Luciferase Assay System (Promega).  
622 VSV-based pseudovirus was produced as previously described (92). In brief, HEK293T cells  
623 were transfected with 2 µg pcDNA3.1 CoV-2 Spike using Lipofectamine2000 (Thermo Fisher).  
624 At 24 hours post-transfection, culture medium was removed from cells and 2 mL of VSV-  
625 luc/GFP + VSV-G (seed particles) was added. At 48 hours post-infection, virus supernatants  
626 were collected, clarified by centrifugation at 500xG for 5 mins, and stored. 50 µL of virus  
627 supernatants were added to target cells for a period of 24 hours prior to fixation with 4%  
628 paraformaldehyde (for measurements of GFP+ cells with flow cytometry). For infections with  
629 replication-competent SARS-CoV-2 (WA1) assessed by plaque assay, rapamycin, everolimus,  
630 temsirolimus, or ridaforolimus (20 µM) were used to pretreat cells for 4 hours and then drugs  
631 were washed away prior to addition of virus at a multiplicity of infection (MOI) of 0.1. DMSO  
632 (Sigma) was used as a vehicle control. At one-hour post-virus addition, cells were washed once  
633 with 1X PBS and overlaid with complete medium. Supernatants were harvested 24 hours later,  
634 and titers were determined on plaque assays performed in Vero E6 cells. For infections with  
635 replication-competent SARS-CoV-2 (WA1) assessed by RT-qPCR, primary hNAEC cultured at  
636 the liquid-air interface for 30-60 days were washed three times with PBS and treated with 20 µM  
637 rapamycin, ridaforolimus, or an equivalent volume of DMSO for 4 hours. Then  $5 \times 10^5$  plaque  
638 forming units were added to cells for 2 hours. Afterwards, inoculum and compound were  
639 removed, and the cells were washed three times with PBS. At 24- and 48-hours post-infection,  
640 Trizol was added to the cells and RNA extraction and RT-qPCR was performed. For single-  
641 round infections using HIV- or VSV-based pseudovirus, rapamycin, everolimus, temsirolimus,  
642 ridaforolimus, or tacrolimus (20 µM) were used to pretreat cells for 4 hours and were maintained

643 for the duration of infection and until harvest of cells for luciferase assay or flow cytometry.  
644 DMSO (Sigma) was used as a vehicle control.

645

#### 646 **FRET-based virus entry assay**

647

648 HIV-based pseudovirus incorporating BlaM-Vpr and CoV-2 Spike was produced by transfecting  
649 HEK293T cells with pNL4-3E- (15 µg), pCMV4-BlaM-Vpr (5 µg), and pcDNA3.1 CoV-2 Spike  
650 (5 µg) using the calcium phosphate technique. Briefly, six million 293T cells were seeded in a  
651 T75 flask. Plasmid DNA was mixed with sterile H<sub>2</sub>O, CaCl<sub>2</sub>, and Tris-EDTA (TE) buffer, and  
652 the totality was combined with Hepes-buffered saline (HBS). The transfection volume was added  
653 dropwise, and cells were incubated at 37°C for 48 h. Supernatants were recovered and clarified  
654 by centrifugation, passed through a 0.45 µm filter, and stored. Titers were measured using an  
655 HIV-1 p24 ELISA kit (XpressBio). 50 ng p25 equivalent of virus was added to HeLa-ACE2 cells  
656 for 2 hours. Cells were washed and labeled with the CCF2-AM β-lactamase Loading Kit  
657 (Invitrogen) for 2 hours and analyzed for CCF2 cleavage by flow cytometry as described (93).  
658 Rapamycin, everolimus, temsirolimus, or ridaforolimus (20 µM) were used to pretreat cells for 4  
659 hours prior to virus addition and were maintained for the duration of infection. DMSO (Sigma)  
660 was used as a vehicle control.

661

#### 662 **Western blot, antibodies, and flow cytometry**

663 Whole cell lysis was performed with RIPA buffer (Thermo Fisher) supplemented with Halt  
664 Protease Inhibitor EDTA-free (Thermo Fisher). Lysates were clarified by centrifugation and  
665 supernatants were collected and stored. Protein concentration was determined with the Protein  
666 Assay Kit II (Bio-Rad), and 10-15 µg of protein was loaded into 12% acrylamide Criterion XT  
667 Bis-Tris Precast Gels (Bio-Rad). Electrophoresis was performed with NuPage MES SDS  
668 Running Buffer (Invitrogen) and proteins were transferred to Amersham Protran Premium  
669 Nitrocellulose Membrane, pore size 0.20 µm (GE Healthcare). Membranes were blocked with  
670 Odyssey Blocking Buffer (Li-COR) and incubated with the following primary antibodies diluted  
671 in Odyssey Antibody Diluent (Li-COR): anti-IFITM1 (60074-1-Ig; Proteintech), anti-IFITM2  
672 (66137-1-Ig; Proteintech), anti-IFITM3 (EPR5242, ab109429; Abcam), anti-Fragilis (ab15592;  
673 Abcam (detects murine IFITM3)), anti-IFITM2/3 (66081-1-Ig; Proteintech), anti-actin (C4, sc-  
674 47778; Santa Cruz Biotechnology), anti-hACE2 (ab15348; Abcam), anti-TFEB (4240S; Cell  
675 Signaling Technology), and anti-pTFEB (Ser211) (37681S; Cell Signaling Technology).  
676 Secondary antibodies conjugated to DyLight 800 or 680 (Li-Cor) and the Li-Cor Odyssey CLx  
677 imaging system were used to reveal specific protein detection. Images were analyzed (including  
678 signal quantification) and assembled using ImageStudioLite (Li-Cor). Cell viability was  
679 measured using LIVE/DEAD Red Dead Cell Stain Kit (Thermo Fisher). Cells were fixed and  
680 permeabilized with Cytfix/Cytoperm reagent (BD) for 20 minutes and washed in Perm/Wash  
681 buffer (BD). Flow cytometry was performed on an LSRFortessa (BD).

#### 682 **Confocal fluorescence and immunofluorescence microscopy**

683

684 HeLa-ACE2 cells were fixed with 4% paraformaldehyde, stained with anti-IFITM2/3 (66081-1-  
685 Ig; Proteintech), goat anti-mouse IgG Alexa Fluor 647 (A21235; Thermo Fisher) and DAPI  
686 (62248; Thermo Fisher), and imaged in a glass-bottom tissue culture plate with an Operetta CLS

687 High-Content Analysis System (Perkin Elmer). For measurement of TFEB-GFP  
688 nuclear/cytoplasmic distribution, HeLa-ACE2 cells were transfected with pEGFP-N1-TFEB for  
689 24 hours, fixed with 4% paraformaldehyde, stained with HCS CellMask Red Stain (H32712;  
690 Thermo Fisher) and DAPI, and imaged with an Operetta CLS. Using Harmony software (Perkin  
691 Elmer), nuclear/cytoplasmic ratios of TFEB-GFP were calculated in single cells as follows: cells  
692 were delineated by CellMask Red Stain, nuclei were delineated by DAPI, nuclear TFEB-GFP  
693 was designated as GFP overlapping with DAPI, and cytoplasmic TFEB-GFP was designated as  
694 total GFP signal minus nuclear TFEB-GFP. Average ratios were calculated from 20-30 cells per  
695 field, and the mean of averages from 10 fields was obtained (total of approximately 250 cells per  
696 condition). For measurement of IFITM2/3 levels in cells transfected with TFEB $\Delta$ 30-GFP, HeLa-  
697 ACE2 cells were transfected with pEGF-N1- $\Delta$ 30TFEB for 24 hours, fixed and permeabilized  
698 with BD Cytotfix/Cytoperm (Fisher Scientific), stained with anti-IFITM2/3 and goat anti-mouse  
699 IgG Alexa Fluor 647, and imaged with an Operetta CLS. The IFITM2/3 fluorescence intensity  
700 within a single, medial Z section was measured in approximately 150 GFP-negative cells and  
701 150 GFP-positive cells using the freehand selections tool in ImageJ.

702

### 703 **RT-qPCR of viral and cellular transcripts in infected primary human nasal epithelial cells**

704

705 Cells lysed with Trizol were mixed with chloroform (Sigma) at a 5:1 (Trizol:chloroform) ratio.  
706 Mixed samples were mixed thoroughly and incubated at room temperature for 10 minutes,  
707 followed by centrifugation at 12000 x G for 5 minutes to allow separation of the aqueous and  
708 organic phases. Equal volumes of 70% ethanol were added to the aqueous phases, mixed  
709 thoroughly, and incubated at room temperature for 5 minutes. RNA purification was performed  
710 using the PureLink RNA Mini Kit (Invitrogen) according to manufacturer's instructions. Purified  
711 RNA product was immediately used with the One-step PrimeScript RT-PCR Kit (Takara).  
712 Primers and probes were obtained from IDT. The primers and probes used to amplify and  
713 quantify *ORF1a* are as follows (5'-3'): ORF1a-F AGAAGATTGGTTAGATGATGATAGT;  
714 ORF1a-R TTCCATCTCTAATTGAGGTTGAACC; ORF1a-P  
715 FAM/TCCTCACTGCCGTCTTGTGACCA/BHQ13. The primers and probes used to amplify  
716 and quantify *IL6* are as follows (5'-3'): IL6-F GCAGATGAGTACAAAAGTCCTGA; IL6-R  
717 TTCTGTGCCTGCAGCTTC; IL6-P 56-  
718 FAM/CAACCACAA/ZEN/ATGCCAGCCTGCT/31ABkFQ. The primers and probes used to  
719 amplify and quantify *IFNB1* are as follows (5'-3'): IFNB1-F  
720 GAAACTGAAGATCTCCTAGCCT; IFNB1-R GCCATCAGTCACTTAAACAGC; IFNB1-P  
721 56-FAM/TGAAGCAAT/ZEN/TGTCCAGTCCCAGAGG/31ABkFQ. The primers and probes  
722 used to amplify and quantify *ACTB* are as follows (5'-3'): ACTB-F  
723 ACAGAGCCTCGCCTTTG; ACTB-R CCTTGCACATGCCGGAG; ACTB-P 56-  
724 FAM/TCATCCATG/ZEN/GTGAGCTGGCGG/31ABkFQ. Reaction mixtures of 20  $\mu$ L  
725 (including 2.2  $\mu$ L total RNA, 0.2  $\mu$ M forward and reverse primers, and 0.1  $\mu$ M probe) were  
726 subjected to reverse transcription (5 min at 45°C, followed by 10 s at 95°C) and 40 cycles of  
727 PCR (5 s at 95°C followed by 20 s at 60°C) in a CFX Opus 96 Real-Time PCR System (Bio-  
728 Rad). Results were analyzed by the Comparative CT Method ( $\Delta\Delta C_t$  Method). RNA levels for  
729 *ORF1a*, *IL6*, and *IFNB1* in each sample were normalized to *ACTB*.

730

### 731 **In vivo infections of hamsters and mice with SARS-CoV-2**

732



733 Male Golden Syrian hamsters between the ages of 6-8 weeks were acclimated for 11 days  
734 following receipt. Hamsters received an intraperitoneal injection (500  $\mu$ L) of rapamycin (HY-  
735 10219; MedChemExpress) or ridaforolimus (HY-50908; MedChemExpress) at 3 mg/kg or an  
736 equivalent amount of DMSO (8 hamsters per group). Four hours later, hamsters were challenged  
737 with  $6 \times 10^3$  plaque forming units of SARS-CoV-2 isolate USA-WA1/2020 (amplified on Calu-3  
738 cells) through intranasal inoculation (50  $\mu$ L in each nare). Half of the hamsters in each group  
739 received a second injection at day 2 post-infection. Clinical observations and weights were  
740 recorded daily up until day 10 post-infection. According to Institutional Animal Care and Use  
741 Committee human euthanasia criteria, hamsters were euthanized immediately if weight loss  
742 exceeded 20% or if agonal breathing was detected. Otherwise, hamsters were euthanized on day  
743 10 post-infection. Oral swabs were collected on day 2 post-infection for measurement of viral  
744 RNA by quantitative PCR of the viral N (nucleocapsid) gene. Lungs were harvested following  
745 euthanasia (day 10 or earlier) and infectious viral load was determined by TCID<sub>50</sub> assay in Vero-  
746 TMPRSS2 cells. Histopathologic analysis of hamster lungs was performed by Experimental  
747 Pathology Laboratories, Inc. At necropsy, the left lung lobe was collected and placed in 10%  
748 neutral buffered formalin and processed to hematoxylin and eosin stained slides and examined  
749 by a board-certified pathologist. Histopathologic findings are presented in Appendix and  
750 Supplemental Table 1. Findings were graded from one to five (increasing severity). Male  
751 C57BL/6 mice received an intraperitoneal injection of 3 mg/kg rapamycin (NC9362949; LC-  
752 Laboratories) or an equivalent amount of DMSO (7 and 6 mice per group, respectively). The  
753 following day, mice were challenged intranasally with  $5 \times 10^4$  TCID<sub>50</sub> equivalent of MA10  
754 SARS-CoV-2 (USA-WA1/2020 backbone). Mice received a second injection of rapamycin or  
755 DMSO on the day of infection and a third on day one post-infection. Mice were euthanized for  
756 lung harvest on day two post-infection. Infectious viral load was determined by TCID<sub>50</sub> assay in  
757 Vero-TMPRSS2 cells. Following UV-inactivation of lung homogenates, IL-6 protein was  
758 detected by Hamster IL-6 Sandwich ELISA Kit (AssayGenie) or Mouse IL-6 DuoSet Sandwich  
759 ELISA kit (R&D Systems) according to manufacturers' instructions. Animal studies were  
760 conducted in compliance with all relevant local, state, and federal regulations and were approved  
761 by the Institutional Animal Care and Use Committee of Bioqual and of the Ohio State  
762 University.

763

## 764 **Statistics**

765

766 The statistical tests performed in each figure are described in the accompanying figure legend. In  
767 general, the cutoff (alpha) for significance was 0.05 and two-tailed tests were always performed.

768

## 769 **Study approval**

770

771 Animal studies were conducted in compliance with all relevant local, state, and federal  
772 regulations and were approved by the Institutional Animal Care and Use Committee of Bioqual  
773 and of the Ohio State University.

774

## 775 **Author Contributions**

776

777 AAC and GS designed the research studies and wrote the manuscript. GS, AIC, TL, AK, SM,  
778 KKL, TD, AZ, AE, LZ, and SK conducted experiments, acquired data, and analyzed data. PAB

779 provided reagents. JWY, SMB, JSY, and AAC obtained funding and supervised the experiments.  
780 All authors contributed to editing of the manuscript.

781

## 782 **Conflict of interest statement**

783

784 The authors have declared that no conflict of interest exists.

785

## 786 **Acknowledgements**

787

788 We thank Michael Letko and Vincent Munster for providing VSV-luc/GFP seed particles  
789 and CoV and CoV-2 Spike plasmids, Thomas Gallagher for providing CoV, CoV-2, and MERS  
790 Spike plasmids, Alan Rein for facilitating lentiviral pseudovirus production, Scott H. Randell for  
791 providing UNC99B, Ramnik J. Xavier for providing HeLa *TFEB* KO cells, Eric O. Freed for  
792 providing primary HSAEC, the Integrated Research Facility (NIAID) at Fort Detrick for  
793 providing *ORF1a* primers and probe, and the SARS-CoV-2 Virology Core (NIAID) for use of  
794 their dedicated BSL3 laboratory space.

795

## 796 **Funding sources**

797

798 Work in the lab of AAC was funded by the Intramural Research Program, National  
799 Institutes of Health, National Cancer Institute, Center for Cancer Research and an Intramural  
800 Targeted Anti-COVID-19 award from the National Institute of Allergy and Infectious Diseases.  
801 Work in the lab of SMB was funded by the Division of Intramural Research, National Institutes  
802 of Health, National Institute of Allergy and Infectious Diseases. The content of this publication  
803 does not necessarily reflect the views or policies of the Department of Health and Human  
804 Services, nor does mention of trade names, commercial products, or organizations imply  
805 endorsement by the U.S. Government. Work in the lab of JSY was funded by National Institutes  
806 of Health grants AII30110, AI151230, AI142256, and HL154001.

807

## 808 **References**

809

- 810 1. Zhu N, Zhang D, Wang W, Li X, Yang B, Song J, et al. A Novel Coronavirus from  
811 Patients with Pneumonia in China, 2019. *New England Journal of Medicine*.  
812 2020;382(8):727-33.
- 813 2. Wu F, Zhao S, Bin Y, Chen Y-M, Wang W, Song Z-G, et al. A new coronavirus  
814 associated with human respiratory disease in China. *Nature*. 2020:1-20.
- 815 3. Zhang X, Tan Y, Ling Y, Lu G, Liu F, Yi Z, et al. Viral and host factors related to the  
816 clinical outcome of COVID-19. *Nature*. 2020:1-18.
- 817 4. Aydillo T, Babady NE, and Kamboj M. Shedding of Viable SARS-CoV-2 after  
818 Immunosuppressive Therapy for Cancer. *New England Journal of Medicine*.  
819 2020;383(26):2586-8.
- 820 5. Wei J, Zhao J, Han M, Meng F, and Zhou J. SARS-CoV-2 infection in  
821 immunocompromised patients: humoral versus cell-mediated immunity. *Journal for  
822 immunotherapy of cancer*. 2020;8(2):e000862.
- 823 6. Tarhini H, Recoing A, Bridier-Nahmias A, Rahi M, Lambert C, Martres P, et al. Long  
824 term SARS-CoV-2 infectiousness among three immunocompromised patients: from

- 825 prolonged viral shedding to SARS-CoV-2 superinfection. *The Journal of Infectious*  
826 *Diseases*. 2021.
- 827 7. Baang JH, Smith C, Mirabelli C, Valesano AL, Manthei DM, Bachman MA, et al.  
828 Prolonged Severe Acute Respiratory Syndrome Coronavirus 2 Replication in an  
829 Immunocompromised Patient. *The Journal of Infectious Diseases*. 2021;223(1):23-7.
- 830 8. Avanzato VA, Matson MJ, Seifert SN, Pryce R, Williamson BN, Anzick SL, et al. Case  
831 Study: Prolonged Infectious SARS-CoV-2 Shedding from an Asymptomatic  
832 Immunocompromised Individual with Cancer. *Cell*. 2020;183(7):1901-12.e9.
- 833 9. Gordon DE, Jang GM, Bouhaddou M, Xu J, Obernier K, White KM, et al. A SARS-CoV-  
834 2 protein interaction map reveals targets for drug repurposing. *Nature*. 2020:1-30.
- 835 10. Zhou Y, Hou Y, Shen J, Huang Y, Martin W, and Cheng F. Network-based drug  
836 repurposing for novel coronavirus 2019-nCoV/SARS-CoV-2. *Cell Discovery*. 2020:1-18.
- 837 11. Appelberg S, Gupta S, Svensson Akusjärvi S, Ambikan AT, Mikaeloff F, Saccon E, et al.  
838 Dysregulation in Akt/mTOR/HIF-1 signaling identified by proteo-transcriptomics of  
839 SARS-CoV-2 infected cells. *Emerging Microbes & Infections*. 2020;9(1):1748-60.
- 840 12. Blagosklonny MV. From causes of aging to death from COVID-19. *Aging*.  
841 2020;12(11):10004-21.
- 842 13. Ciliberto G, Mancini R, and Paggi MG. Drug repurposing against COVID-19: focus on  
843 anticancer agents. 2020:1-9.
- 844 14. Husain A, and Byrareddy SN. Rapamycin as a potential repurpose drug candidate for the  
845 treatment of COVID-19. *Chemico-Biological Interactions*. 2020;331:109282.
- 846 15. Zheng Y, Li R, and Liu S. Immunoregulation with mTOR inhibitors to prevent COVID-  
847 19 severity: A novel intervention strategy beyond vaccines and specific antiviral  
848 medicines. *Journal of medical virology*. 2020;92(9):1495-500.
- 849 16. Terrazzano G, Rubino V, Palatucci AT, Giovazzino A, Carriero F, and Ruggiero G. An  
850 Open Question: Is It Rational to Inhibit the mTor-Dependent Pathway as COVID-19  
851 Therapy? 2020:1-5.
- 852 17. Ramaiah MJ. mTOR inhibition and p53 activation, microRNAs: The possible therapy  
853 against pandemic COVID-19. *Gene reports*. 2020;20:100765.
- 854 18. Zhavoronkov A. Geroprotective and senoremediative strategies to reduce the  
855 comorbidity, infection rates, severity, and lethality in gerophilic and gerolavic infections.  
856 *Aging*. 2020;12(8):6492-510.
- 857 19. Willyard C. Ageing and Covid Vaccines. *Nature*. 2020;586(7829):352-4.
- 858 20. Omarjee L, Janin A, Perrot F, Laviolle B, Meilhac O, and Mahe G. Targeting T-cell  
859 senescence and cytokine storm with rapamycin to prevent severe progression in COVID-  
860 19. *Clinical immunology (Orlando, Fla)*. 2020;216:108464.
- 861 21. Laplante M, and Sabatini DM. mTOR signaling in growth control and disease. *Cell*.  
862 2012;149(2):274-93.
- 863 22. Bertram PG, Zeng C, Thorson J, Shaw AS, and Zheng XF. The 14-3-3 proteins positively  
864 regulate rapamycin-sensitive signaling. *Current biology : CB*. 1998;8(23):1259-67.
- 865 23. Vignot S, Faivre S, Aguirre D, and Raymond E. mTOR-targeted therapy of cancer with  
866 rapamycin derivatives. *Annals of Oncology*. 2005;16(4):525-37.
- 867 24. Lamming DW, Ye L, Sabatini DM, and Baur JA. Rapalogs and mTOR inhibitors as anti-  
868 aging therapeutics. *Journal of Clinical Investigation*. 2013;123(3):980-9.
- 869 25. Abdel-Magid AF. Rapalogs Potential as Practical Alternatives to Rapamycin. *ACS*  
870 *medicinal chemistry letters*. 2019;10(6):843-5.

- 871 26. Benjamin D, Colombi M, Moroni C, and Hall MN. Rapamycin passes the torch: a new  
872 generation of mTOR inhibitors. *Nature Reviews Drug Discovery*. 2011;1-13.
- 873 27. Marz AM, Fabian AK, Kozany C, Bracher A, and Hausch F. Large FK506-Binding  
874 Proteins Shape the Pharmacology of Rapamycin. *Molecular and Cellular Biology*.  
875 2013;33(7):1357-67.
- 876 28. Zoncu R, Efeyan A, and Sabatini DM. mTOR: from growth signal integration to cancer,  
877 diabetes and ageing. *Nature Reviews in Molecular Cell Biology*. 2011;12(1):21-35.
- 878 29. Chi H. Regulation and function of mTOR signalling in T cell fate decisions. *Nature*  
879 *Reviews Immunology*. 2012:1-14.
- 880 30. Mangalmurti N, and Hunter CA. Cytokine Storms: Understanding COVID-19. *Immunity*.  
881 2020;53(1):19-25.
- 882 31. Mehta P, McAuley DF, Brown M, Sanchez E, Tattersall RS, Manson JJ, et al. COVID-  
883 19: consider cytokine storm syndromes and immunosuppression. *Lancet (London,*  
884 *England)*. 2020;395(10229):1033-4.
- 885 32. Manjili RH, Zarei M, Habibi M, and Manjili MH. COVID-19 as an Acute Inflammatory  
886 Disease. *The Journal of Immunology*. 2020;205(1):12-9.
- 887 33. Bischof E, Siow RC, Zhavoronkov A, and Kaeberlein M. The potential of rapalogs to  
888 enhance resilience against SARS-CoV-2 infection and reduce the severity of COVID-19.  
889 *The Lancet Healthy longevity*. 2021;2(2):e105-e11.
- 890 34. Mullen PJ, Garcia G, Purkayastha A, Matulionis N, Schmid EW, Momcilovic M, et al.  
891 SARS-CoV-2 infection rewires host cell metabolism and is potentially susceptible to  
892 mTORC1 inhibition. *Nature communications*. 2021:1-10.
- 893 35. Alsuwaidi AR, George JA, Almarzooqi S, Hartwig SM, Varga SM, and Souid A-K.  
894 Sirolimus alters lung pathology and viral load following influenza A virus infection.  
895 *Respiratory research*. 2017;18(1):136.
- 896 36. Huang C-T, Hung C-Y, Chen T-C, Lin C-Y, Lin Y-C, Chang C-S, et al. Rapamycin  
897 adjuvant and exacerbation of severe influenza in an experimental mouse model. *Scientific*  
898 *Reports*. 2017;7(1):873-8.
- 899 37. Ozog S, Timberlake ND, Hermann K, Garijo O, Haworth KG, Shi G, et al. Resveratrol  
900 trimer enhances gene delivery to hematopoietic stem cells by reducing antiviral  
901 restriction at endosomes. *Blood*. 2019;134(16):1298-311.
- 902 38. Shi G, Ozog S, Torbett BE, and Compton AA. mTOR inhibitors lower an intrinsic barrier  
903 to virus infection mediated by IFITM3. *Proceedings of the National Academy of Sciences*  
904 *of the United States of America*. 2018;115(43):E10069-E78.
- 905 39. Shi G, Schwartz O, and Compton AA. More than meets the I: the diverse antiviral and  
906 cellular functions of interferon-induced transmembrane proteins. *Retrovirology*.  
907 2017;14(1):1-11.
- 908 40. Majdoul S, and Compton AA. Lessons in self-defence: inhibition of virus entry by  
909 intrinsic immunity. *Nature Reviews Immunology*. 2021.
- 910 41. Bestle D, Heindl MR, Limburg H, Van Lam van T, Pilgram O, Moulton H, et al.  
911 TMPRSS2 and furin are both essential for proteolytic activation of SARS-CoV-2 in  
912 human airway cells. *Life science alliance*. 2020;3(9):e202000786.
- 913 42. Hoffmann M, Kleine-Weber H, and Pöhlmann S. A Multibasic Cleavage Site in the Spike  
914 Protein of SARS-CoV-2 Is Essential for Infection of Human Lung Cells. *Molecular Cell*.  
915 2020;78(4):779-84.e5.

- 916 43. Hoffmann M, Kleine-Weber H, Schroeder S, Krüger N, Herrler T, Erichsen S, et al.  
917 SARS-CoV-2 Cell Entry Depends on ACE2 and TMPRSS2 and Is Blocked by a  
918 Clinically Proven Protease Inhibitor. *Cell*. 2020;1-19.
- 919 44. Mejlvang J, Olsvik H, Svenning S, Bruun JA, Abudu YP, Larsen KB, et al. Starvation  
920 induces rapid degradation of selective autophagy receptors by endosomal  
921 microautophagy. *J Cell Biol*. 2018;217(10):3640-55.
- 922 45. Olsvik HL, Svenning S, Abudu YP, Brech A, Stenmark H, Johansen T, et al. Endosomal  
923 microautophagy is an integrated part of the autophagic response to amino acid starvation.  
924 *Autophagy*. 2019;15(1):182-3.
- 925 46. Sahu R, Kaushik S, Clement CC, Cannizzo ES, Scharf B, Follenzi A, et al.  
926 Microautophagy of cytosolic proteins by late endosomes. *Dev Cell*. 2011;20(1):131-9.
- 927 47. Shi G, Kenney AD, Kudryashova E, Zani A, Zhang L, Lai KK, et al. Opposing activities  
928 of IFITM proteins in SARS-CoV-2 infection. *The EMBO journal*. 2020;3:e201900542-  
929 12.
- 930 48. Willett BJ, Grove J, MacLean OA, Wilkie C, De Lorenzo G, Furnon W, et al. SARS-  
931 CoV-2 Omicron is an immune escape variant with an altered cell entry pathway. *Nat*  
932 *Microbiol*. 2022;7(8):1161-79.
- 933 49. Prelli Bozzo C, Nchioua R, Volcic M, Koepke L, Kruger J, Schutz D, et al. IFITM  
934 proteins promote SARS-CoV-2 infection and are targets for virus inhibition in vitro. *Nat*  
935 *Commun*. 2021;12(1):4584.
- 936 50. Kolos JM, Voll AM, Bauder M, and Hausch F. FKBP Ligands-Where We Are and  
937 Where to Go? *Frontiers in pharmacology*. 2018;9:1425.
- 938 51. Roczniak-Ferguson A, Petit CS, Froehlich F, Qian S, Ky J, Angarola B, et al. The  
939 transcription factor TFEB links mTORC1 signaling to transcriptional control of lysosome  
940 homeostasis. *Science signaling*. 2012;5(228):ra42.
- 941 52. Martina JA, Chen Y, Gucek M, and Puertollano R. MTORC1 functions as a  
942 transcriptional regulator of autophagy by preventing nuclear transport of TFEB.  
943 *Autophagy*. 2012;8(6):903-14.
- 944 53. Settembre C, Zoncu R, Medina DL, Vetrini F, Erdin S, Erdin S, et al. A lysosome-to-  
945 nucleus signalling mechanism senses and regulates the lysosome via mTOR and TFEB.  
946 *The EMBO journal*. 2012;31(5):1095-108.
- 947 54. Zhang X, Chen W, Gao Q, Yang J, Yan X, Zhao H, et al. Rapamycin directly activates  
948 lysosomal mucolipin TRP channels independent of mTOR. *PLoS Biology*.  
949 2019;17(5):e3000252-24.
- 950 55. Tostanoski LH, Wegmann F, Martinot AJ, Loos C, McMahan K, Mercado NB, et al.  
951 Ad26 vaccine protects against SARS-CoV-2 severe clinical disease in hamsters. *Nat*  
952 *Med*. 2020;26(11):1694-700.
- 953 56. Alsuwaidi AR, George JA, Almarzooqi S, Hartwig SM, Varga SM, and Souid A-K.  
954 Sirolimus alters lung pathology and viral load following influenza A virus infection.  
955 *Respiratory research*. 2017;18(1):1-8.
- 956 57. Sasongko TH, Ismail NFD, Malik NMANA, and Zabidi-Hussin ZAMH. Rapamycin and  
957 its analogues (rapalogs) for Tuberous Sclerosis Complex-associated tumors: a systematic  
958 review on non-randomized studies using meta-analysis. *Orphanet Journal of Rare*  
959 *Diseases*. 2015:1-11.
- 960 58. Reagan-Shaw S, Nihal M, and Ahmad N. Dose translation from animal to human studies  
961 revisited. *FASEB J*. 2008;22(3):659-61.

- 962 59. Cloughesy TF, Yoshimoto K, Nghiemphu P, Brown K, Dang J, Zhu S, et al. Antitumor  
963 activity of rapamycin in a Phase I trial for patients with recurrent PTEN-deficient  
964 glioblastoma. *PLoS Med.* 2008;5(1):e8.
- 965 60. Sun Y, Rha S, Lee SH, Guo J, Ueda T, Qin S, et al. Phase II study of the safety and  
966 efficacy of temsirolimus in East Asian patients with advanced renal cell carcinoma. *Jpn J*  
967 *Clin Oncol.* 2012;42(9):836-44.
- 968 61. Martynov MY, Kutashov VA, and Ulyanova OV. COVID 19 in a family with rare  
969 genetic disease of the nervous system. *Neurology, Neuropsychiatry, Psychosomatics.*  
970 2022;14(1):108-14.
- 971 62. Medina DL, Di Paola S, Peluso I, Armani A, De Stefani D, Venditti R, et al. Lysosomal  
972 calcium signalling regulates autophagy through calcineurin and TFEB. *Nature Cell*  
973 *Biology.* 2015;17(3):288-99.
- 974 63. Schuck S. Microautophagy - distinct molecular mechanisms handle cargoes of many  
975 sizes. *Journal of Cell Science.* 2020;133(17).
- 976 64. Oku M, and Sakai Y. Three Distinct Types of Microautophagy Based on Membrane  
977 Dynamics and Molecular Machineries. *BioEssays.* 2018;40(6):1800008-6.
- 978 65. Santambrogio L, and Cuervo AM. Chasing the elusive mammalian microautophagy.  
979 *Autophagy.* 2011;7(6):652-4.
- 980 66. Tekirdag K, and Cuervo AM. Chaperone-mediated autophagy and endosomal  
981 microautophagy: Jointed by a chaperone. *Journal of Biological Chemistry.*  
982 2018;293(15):5414-24.
- 983 67. Mijaljica D, Prescott M, and Devenish RJ. Microautophagy in mammalian cells:  
984 revisiting a 40-year-old conundrum. *Autophagy.* 2011;7(7):673-82.
- 985 68. Sato M, Seki T, Konno A, Hirai H, Kurauchi Y, Hisatsune A, et al. Rapamycin activates  
986 mammalian microautophagy. *Journal of Pharmacological Science.* 2019;140(2):201-4.
- 987 69. Yang X, Zhang W, Wen X, Bulinski PJ, Chomchai DA, Arines FM, et al. TORC1  
988 regulates vacuole membrane composition through ubiquitin- and ESCRT-dependent  
989 microautophagy. *The Journal of Cell Biology.* 2020;219(3).
- 990 70. Li M, Rong Y, Chuang Y-S, Peng D, and Emr SD. Ubiquitin-Dependent Lysosomal  
991 Membrane Protein Sorting and Degradation. *Molecular Cell.* 2015;57(3):467-78.
- 992 71. Chesarino NM, McMichael TM, and Yount JS. E3 Ubiquitin Ligase NEDD4 Promotes  
993 Influenza Virus Infection by Decreasing Levels of the Antiviral Protein IFITM3. *PLoS*  
994 *Pathogens.* 2015;11(8):e1005095.
- 995 72. Compton AA, Roy N, Porrot F, Billet A, Casartelli N, Yount JS, et al. Natural mutations  
996 in IFITM3 modulate post-translational regulation and toggle antiviral specificity. *EMBO*  
997 *reports.* 2016;17(11):1657-71.
- 998 73. Yang X, Zhang W, Wen X, Bulinski PJ, Chomchai DA, Arines FM, et al. TORC1  
999 regulates vacuole membrane composition through ubiquitin- and ESCRT-dependent  
1000 microautophagy. 2019;8:1835-53.
- 1001 74. Di Fruscio G, Schulz A, De Cegli R, Savarese M, Mutarelli M, Parenti G, et al. Lysoplex:  
1002 An efficient toolkit to detect DNA sequence variations in the autophagy-lysosomal  
1003 pathway. *Autophagy.* 2015;11(6):928-38.
- 1004 75. Zhao X, Guo F, Liu F, Cuconati A, Chang J, Block TM, et al. Interferon induction of  
1005 IFITM proteins promotes infection by human coronavirus OC43. *Proceedings of the*  
1006 *National Academy of Sciences.* 2014;111(18):6756-61.

- 1007 76. Winstone H, Lista MJ, Reid AC, Bouton C, Pickering S, Galão RP, et al. The polybasic  
1008 cleavage site in the SARS-CoV-2 spike modulates viral sensitivity to Type I interferon  
1009 and IFITM2. *Journal of Virology*. 2021.
- 1010 77. Zhao X, Zheng S, Chen D, Zheng M, Li X, Li G, et al. LY6E Restricts Entry of Human  
1011 Coronaviruses, Including Currently Pandemic SARS-CoV-2. *Journal of Virology*.  
1012 2020;94(18).
- 1013 78. Zang R, Case JB, Yutuc E, Ma X, Shen S, Gomez Castro MF, et al. Cholesterol 25-  
1014 hydroxylase suppresses SARS-CoV-2 replication by blocking membrane fusion.  
1015 *Proceedings of the National Academy of Sciences of the United States of America*.  
1016 2020;32:202012197.
- 1017 79. Huang IC, Bailey CC, Weyer JL, Radoshitzky SR, Becker MM, Chiang JJ, et al. Distinct  
1018 patterns of IFITM-mediated restriction of filoviruses, SARS coronavirus, and influenza A  
1019 virus. *PLoS Pathogens*. 2011;7(1):e1001258.
- 1020 80. Zhao X, Sehgal M, Hou Z, Cheng J, Shu S, Wu S, et al. Identification of Residues  
1021 Controlling Restriction versus Enhancing Activities of IFITM Proteins on Entry of  
1022 Human Coronaviruses. *Journal of Virology*. 2018;92(6):374-17.
- 1023 81. Bozzo CP, Nchioua R, Volcic M, Wettstein L, Weil T, Krüger J, et al. IFITM proteins  
1024 promote SARS-CoV-2 infection of human lung cells. *bioRxiv*. 2020;1:261-47.
- 1025 82. Zani A, Kenney AD, Kawahara J, Eddy AC, Wang XL, Kc M, et al. Interferon-induced  
1026 transmembrane protein 3 (IFITM3) limits lethality of SARS-CoV-2 in mice. *bioRxiv*.  
1027 2021.
- 1028 83. Beyer DK, and Forero A. Mechanisms of Antiviral Immune Evasion of SARS-CoV-2. *J*  
1029 *Mol Biol*. 2021:167265.
- 1030 84. Hachim MY, Al Heialy S, Hachim IY, Halwani R, Senok AC, Maghazachi AA, et al.  
1031 Interferon-Induced Transmembrane Protein (IFITM3) Is Upregulated Explicitly in  
1032 SARS-CoV-2 Infected Lung Epithelial Cells. *Frontiers in Immunology*. 2020;11:1372.
- 1033 85. Blanco-Melo D, Nilsson-Payant BE, Liu W-C, Uhl S, Hoagland D, Møller R, et al.  
1034 Imbalanced Host Response to SARS-CoV-2 Drives Development of COVID-19. *Cell*.  
1035 2020;181(5):1036-45.e9.
- 1036 86. Ziegler CGK, Miao VN, Owings AH, Navia AW, Tang Y, Bromley JD, et al. Impaired  
1037 local intrinsic immunity to SARS-CoV-2 infection in severe COVID-19. *bioRxiv*.  
1038 2021:2021.02.20.431155.
- 1039 87. Zhang Y, Qin L, Zhao Y, Zhang P, Xu B, Li K, et al. Interferon-induced transmembrane  
1040 protein-3 genetic variant rs12252-C is associated with disease severity in COVID-19. *The*  
1041 *Journal of Infectious Diseases*. 2020.
- 1042 88. Nikoloudis D, Kountouras D, and Hiona A. The frequency of combined IFITM3  
1043 haplotype involving the reference alleles of both rs12252 and rs34481144 is in line with  
1044 COVID-19 standardized mortality ratio of ethnic groups in England. *PeerJ*.  
1045 2020;8:e10402.
- 1046 89. Carey KL, Paulus GLC, Wang L, Balce DR, Luo JW, Bergman P, et al. TFEB  
1047 Transcriptional Responses Reveal Negative Feedback by BHLHE40 and BHLHE41. *Cell*  
1048 *Rep*. 2020;33(6):108371.
- 1049 90. Leist SR, Dinnon KH, 3rd, Schafer A, Tse LV, Okuda K, Hou YJ, et al. A Mouse-  
1050 Adapted SARS-CoV-2 Induces Acute Lung Injury and Mortality in Standard Laboratory  
1051 Mice. *Cell*. 2020;183(4):1070-85 e12.

- 1052 91. Chiramel AI, Meyerson NR, McNally KL, Broeckel RM, Montoya VR, Méndez-Solís O,  
1053 et al. TRIM5 $\alpha$  Restricts Flavivirus Replication by Targeting the Viral Protease for  
1054 Proteasomal Degradation. *Cell Reports*. 2019;27(11):3269-83.e6.  
1055 92. Letko M, Marzi A, and Munster V. Functional assessment of cell entry and receptor  
1056 usage for SARS-CoV-2 and other lineage B betacoronaviruses. *Nature Microbiology*.  
1057 2020;11:1-17.  
1058 93. Compton AA, Bruel T, Porrot F, Mallet A, Sachse M, Euvrard M, et al. IFITM Proteins  
1059 Incorporated into HIV-1 Virions Impair Viral Fusion and Spread. *Cell Host & Microbe*.  
1060 2014;16(6):736-47.  
1061

## 1062 Figure Legends

1063  
1064 **Figure 1: Rapamycin and its analogs share a macrolide structure but differ by the**  
1065 **functional group present at carbon-40.** Violet and green bubbles indicate the FKBP- and  
1066 mTOR-binding sites, respectively.

1067 **Figure 2: Rapalogs promote SARS-CoV-2 infection in lung epithelial cells to different**  
1068 **extents by counteracting the intrinsic antiviral state.** (A) A549-ACE2 were treated with or  
1069 without type I interferon (250 U/mL) for 18 hours and then treated with 20  $\mu$ M rapamycin (Rap),  
1070 everolimus (Eve), temsirolimus (Tem), ridaforolimus (Rid), or an equivalent volume of DMSO  
1071 (D) for 4 hours. HIV-CoV-2 (100 ng p24 equivalent) was added to cells and infection was  
1072 measured by luciferase activity at 48 hours post-infection. Luciferase units were normalized to  
1073 100 in the DMSO condition in the absence of interferon. (B) A549-ACE2 cells from (A) were  
1074 subjected to SDS-PAGE and Western blot analysis. Immunoblotting was performed with anti-  
1075 IFITM2/3, anti-ACE2, and anti-actin (in that order) on the same nitrocellulose membrane.  
1076 Numbers and tick marks indicate size (kilodaltons) and position of protein standards in ladder.  
1077 (C) Primary HSAEC were treated with 20  $\mu$ M Rap, Eve, Tem, Rid, or an equivalent volume of  
1078 DMSO for 4 hours. VSV-CoV-2 (50  $\mu$ L) was added to cells and infection was measured by GFP  
1079 expression at 24 hours post-infection using flow cytometry. (D) A549-ACE2 were treated with  
1080 varying concentrations of Eve or DMSO (equivalent to 30  $\mu$ M of Eve) for 4 hours. SARS-CoV-2  
1081 (nCoV-WA1-2020; MN985325.1) was added to cells at an MOI of 0.1 and infectious titers were  
1082 measured in VeroE6 cells by calculating the TCID<sub>50</sub> per mL of supernatants recovered at 24  
1083 hours post-infection. TCID<sub>50</sub> (pfu per mL) values are shown. Means and standard error were  
1084 calculated from 3-4 experiments. Statistical analysis was performed with one-way ANOVA and  
1085 asterisks indicate significant difference from DMSO. \*, p < 0.05; \*\*, p < 0.01. Rel.; relative. pfu;  
1086 plaque forming units.

1087 **Figure 3: Rapalogs promote SARS-CoV-2 infection in HeLa-ACE2 cells.** (A) HeLa-ACE2  
1088 were treated with varying concentrations of Eve or DMSO for 4 hours. SARS-CoV-2 (nCoV-  
1089 WA1-2020; MN985325.1) was added to cells at MOI 0.1 and infectious titers were measured in  
1090 VeroE6 cells by calculating the TCID<sub>50</sub> of supernatants recovered at 24 hours post-infection.  
1091 TCID<sub>50</sub> (pfu per mL) values are shown. (B) HeLa-ACE2 were treated with 20  $\mu$ M Rap, Eve,  
1092 Tem, Rid, or an equivalent volume of DMSO for 4 hours. SARS-CoV-2 (nCoV-WA1-2020;  
1093 MN985325.1) was added to cells at MOI 0.1 and infectious titers were measured in VeroE6 cells  
1094 by calculating the TCID<sub>50</sub> per mL of supernatants recovered at 24 hours post-infection. TCID<sub>50</sub>  
1095 per mL values were normalized to 100 in the DMSO condition. (C) HeLa-ACE2 were treated



1096 with 20  $\mu$ M Rap, Eve, Tem, Rid, or an equivalent volume of DMSO for 4 hours. HIV-CoV-2  
1097 (100 ng p24 equivalent) was added to cells and infection was measured by luciferase activity at  
1098 48 hours post-infection. Luciferase units were normalized to 100 in the DMSO condition. (D)  
1099 HeLa-ACE2 cells from (C) were subjected to SDS-PAGE and Western blot analysis.  
1100 Immunoblotting was performed with anti-IFITM2, anti-IFITM1, anti-IFITM3, anti-ACE2, and  
1101 anti-actin (in that order) on the same nitrocellulose membrane. (E) IFITM3 levels from (D) were  
1102 normalized to actin levels and summarized from 5 independent experiments. (F) HeLa-ACE2  
1103 were treated with 20  $\mu$ M Rap, Eve, Tem, Rid, or an equivalent volume of DMSO for 4 hours and  
1104 cells were fixed, stained with DAPI and anti-IFITM2/3, and imaged by confocal  
1105 immunofluorescence microscopy. Images represent stacks of 5 Z-slices and one representative  
1106 image is shown per condition. Means and standard error were calculated from 3-6 experiments.  
1107 Statistical analysis was performed with one-way ANOVA and asterisks indicate significant  
1108 difference from DMSO. \*,  $p < 0.05$ ; \*\*,  $p < 0.01$ . Rel.; relative. pfu; plaque forming units.  
1109

1110 **Figure 4: Rapalogs promote cell entry mediated by diverse viral fusion proteins.** (A) HeLa-  
1111 ACE2 were treated with 20  $\mu$ M Rap, Eve, Tem, Rid, or an equivalent volume of DMSO for 4  
1112 hours. HIV-CoV-2 S pseudovirus incorporating BlaM-Vpr (HIV-BlaM-CoV-2) was added to  
1113 cells for 2 hours and washed. Cells were incubated with CCF2-AM for an additional 2 hours and  
1114 fixed. Cleaved CCF2 was measured by flow cytometry. Dot plots visualized as density plots  
1115 from one representative experiment are shown on the left and the percentage of CCF2+ cells  
1116 which exhibit CCF2 cleavage is indicated. Summary data representing the average of four  
1117 experiments is shown on the right. (B) HIV-CoV-1, (C) HIV-MERS-CoV, (D) HIV-IAV HA, or  
1118 (E) HIV-VSV G were added to HeLa-ACE2 or HeLa-DPP4 cells as in (A) and infection was  
1119 measured by luciferase activity at 48 hours post-infection. Luciferase units were normalized to  
1120 100 in the DMSO condition. Means and standard error were calculated from 3-4 experiments.  
1121 Statistical analysis was performed with one-way ANOVA and asterisks indicate significant  
1122 difference from DMSO. \*,  $p < 0.05$ ; \*\*,  $p < 0.01$ . Rel.; relative.  
1123

1124 **Figure 5: Select rapalogs enhance Spike-mediated infection in HeLa-ACE2 by inhibiting**  
1125 **IFITM2 and IFITM3.** (A) HeLa WT and HeLa *IFITM1-3* KO cells were transiently transfected  
1126 with 0.150  $\mu$ g pcDNA3.1-hACE2 for 24 hours. Whole cell lysates were subjected to SDS-PAGE  
1127 and Western blot analysis. Immunoblotting was performed with anti-IFITM2, anti-IFITM3, anti-  
1128 IFITM1, anti-ACE2, and anti-actin (in that order) on the same nitrocellulose membrane. (B)  
1129 HeLa *IFITM1-3* KO were transfected with IFITM2 or IFITM2 and IFITM3 and SDS-PAGE and  
1130 Western blot analysis was performed. (C) HIV-CoV-2 was added to transfected cells from (B)  
1131 and infection was measured by luciferase activity at 48 hours post-infection. Luciferase units  
1132 were normalized to 100 in HeLa WT cells treated with DMSO. (D) HeLa WT were transiently  
1133 transfected with 0.150  $\mu$ g pcDNA3.1-hACE2 for 24 hours. HIV-CoV-2 decorated with ancestral  
1134 Spike (WA1) or Omicron Spike (BA.1) was added and infection was measured by luciferase  
1135 activity at 48 hours post-infection. Luciferase units were normalized to 100 in cells treated with  
1136 DMSO for both pseudoviruses. Means and standard error were calculated from 3 experiments.  
1137 Statistical analysis was performed with one-way ANOVA and asterisks indicate significant  
1138 difference from nearest DMSO condition. \*,  $p < 0.05$ ; \*\*,  $p < 0.01$ . ns; not significant. Rel.;  
1139 relative.  
1140

1141 **Figure 6: Nuclear TFEB triggers IFITM2/3 turnover, promotes Spike-mediated infection,**  
1142 **and is required for enhancement of infection by rapalogs.** (A) A549-ACE2 were treated with  
1143 20  $\mu$ M Rap, Eve, Tem, Rid, tacrolimus (Tac), or DMSO for 4 hours and whole cell lysates were  
1144 subjected to SDS-PAGE and Western blot analysis with anti-TFEB and anti-pTFEB (S211). (B)  
1145 pTFEB (S211) levels were divided by total TFEB levels and summarized as an average of 3  
1146 experiments. (C) HeLa-ACE2 were transfected with TFEB-GFP for 24 hours, treated with Rap,  
1147 Eve, Tem, Rid or Tac for 4 hours, stained with DAPI and CellMask (not shown), and imaged by  
1148 high-content microscopy. Representative images are shown. (D) Ratio of nuclear to cytoplasmic  
1149 TFEB-GFP was calculated in individual cells and average ratios derived from 9 separate fields of  
1150 view (each containing 20-40 cells) are shown. (E) HeLa-ACE2 were transfected with 0.5  $\mu$ g  
1151 TFEB $\Delta$ 30-GFP for 24 hours, fixed, stained with anti-IFITM2/3, and imaged by high-content  
1152 microscopy (representative field on left). Average intensity of IFITM2/3 levels in 150 GFP-  
1153 negative and 150 GFP-positive cells were grouped from two transfections (right). (F) HeLa-  
1154 ACE2 were transfected (or not) with 0.5  $\mu$ g TFEB $\Delta$ 30-GFP, for 24 hours and HIV-CoV-2 (100  
1155 ng p24 equivalent) was added. Infection was measured by luciferase at 48 hours post-infection.  
1156 Luciferase units were normalized to 100 in the non-transfected condition. (G) HeLa WT or  
1157 *TFEB* KO were transfected with 0.3  $\mu$ g pcDNA3.1-hACE2 for 24 hours and treated with 20  $\mu$ M  
1158 rapalogs/DMSO for 4 hours. HIV-CoV-2 (100 ng p24 equivalent) was added and luciferase  
1159 activity measured at 48 hours post-infection. Luciferase units were normalized to 100 in the non-  
1160 transfected condition. Means and standard error were calculated from 3 (A), 5 (F), and 3 (G)  
1161 experiments. Statistical analysis was performed with one-way ANOVA or student's T test (E and  
1162 F) and asterisks indicate significant difference from DMSO or non-transfected conditions. \*,  $p <$   
1163 0.05; \*\*,  $p <$  0.01. Rel.; relative. A.u.; arbitrary units.

1164  
1165 **Figure 7: Rapamycin increases susceptibility of primary human nasal epithelial cells to**  
1166 **SARS-CoV-2 infection while limiting pro-inflammatory cytokine induction.** Primary human  
1167 nasal epithelial cells (hNAEC) pooled from 12 donors were cultured at the liquid-air interface for  
1168 30-60 days were infected with  $5 \times 10^5$  plaque forming units (pfu) SARS-CoV-2 (WA1). At 24  
1169 hours and 48 hours post-infection, Trizol was added to cells and total RNA extraction was  
1170 performed. RT-qPCR was performed using primers and probes specific to viral *ORF1a* (A),  
1171 cellular *IL6* (B), and cellular *IFNBI* (C). Means and standard error were calculated from 2  
1172 experiments (infection of pooled cells from 12 human donors was performed in duplicate).  
1173 Relative RNA levels are presented Comparative CT method with beta actin (*ACTB*) serving as an  
1174 endogenous control. RNA levels present in the DMSO condition at 24 hours were normalized to  
1175 1. *ORF1a* was not detected in non-infected cells. Statistical analysis was performed using one  
1176 way ANOVA. \*,  $p <$  0.05; \*\*,  $p <$  0.01. ns; not significant. rel.; relative.

1177  
1178 **Figure 8: Rapamycin injection into hamsters intensifies viral disease during SARS-CoV-2**  
1179 **infection.** (A) Golden Syrian hamsters were injected intraperitoneally with 3 mg/kg Rap, Rid, or  
1180 equivalent amounts of DMSO (4 animals per group). Four hours later, hamsters were infected  
1181 intranasally with  $6 \times 10^3$  plaque forming units of SARS-CoV-2. At 2 days post-infection, half of  
1182 the animals received a second injection of Rap, Rid, or DMSO. Oral swabs were taken and used  
1183 for measurement of oral viral RNA load by qPCR. At 10 days post-infection (or earlier, if more  
1184 than 20% weight loss or agonal breathing was detected), hamsters were euthanized, and lungs  
1185 were harvested for determination of infectious virus titer by TCID<sub>50</sub> assay and IL-6 ELISA. (B)  
1186 Individual body weight trajectories for each treatment group are plotted by day post-infection.

1187 Red lines indicate animals that required euthanasia for humane endpoints (more than 20% weight  
1188 loss or agonal breathing). (C) Kaplan-Meier survival curves were generated according to the  
1189 dates of euthanasia (or in one case, when an animal was found dead). (D) Infectious virus titers  
1190 in lungs were determined by TCID<sub>50</sub> in Vero-TMPRSS2 cells. Data is depicted as floating bars  
1191 (minimum, maximum, and mean shown). (E) Viral RNA copy number was determined by qPCR  
1192 from oral swab at 2 days post-infection. Data is depicted as box and whiskers plots. (F) IL-6  
1193 protein levels in lungs were determined using a hamster IL-6 ELISA kit. Statistical analysis in  
1194 (C) was performed by comparing survival curves between Rap and DMSO or Rid and DMSO  
1195 using the Log-rank (Mantel-Cox) test. Statistical analysis in (D) was performed by comparing all  
1196 individuals (survivors and euthanized) in the Rap and Rid groups using the Mann-Whitney test.  
1197 Statistical analysis in (E) and (F) was performed by one way ANOVA. Illustration created with  
1198 BioRender.com. \*, p < 0.05; \*\*, p < 0.01. ns; not significant.  
1199

1200 **Figure 9: Rapamycin injection into mice downmodulates IFITM3 in lungs and boosts MA**  
1201 **SARS-CoV-2 titers.** (A) C57BL/6 mice were injected with 3 mg/kg of Rap or an equivalent  
1202 amount of DMSO (6 or 7 mice per group, respectively). The following day, mice were infected  
1203 intranasally with 6 x 10<sup>4</sup> TCID<sub>50</sub> mouse-adapted (MA) SARS-CoV-2. Mice received second and  
1204 third injections of Rap or DMSO on the day of infection and on day 1 post-infection. (B) Lungs  
1205 were harvested from infected mice upon euthanasia at day 2 post-infection and infectious viral  
1206 loads were determined by TCID<sub>50</sub> (B) and IL-6 protein was measured by a mouse IL-6 ELISA  
1207 kit (C). Geometric mean TCID<sub>50</sub> per gram was calculated per treatment group. Statistical  
1208 analysis was performed with Mann-Whitney test and asterisks indicate significant difference  
1209 from DMSO. \*, p < 0.05; \*\*, p < 0.01. (D) Lung homogenates (3 µg) from mice injected with  
1210 Rap or DMSO were subjected to SDS-PAGE and Western blot analysis. Immunoblotting was  
1211 performed with anti-Fragilis/IFITM3 (ab15592) and anti-actin. Illustration created with  
1212 BioRender.com.  
1213

1214 **Figure 10: Model for rapalog-mediated enhancement of SARS-CoV-2 infection.** Rapamycin,  
1215 everolimus, and temsirolimus potently inhibit the phosphorylation of TFEB by mTOR, while  
1216 ridaforolimus is a less potent inhibitor. As a result, TFEB translocates into the nucleus and  
1217 induces genes functioning in lysosomal activities, including autophagy-related pathways.  
1218 Nuclear TFEB triggers a microautophagy pathway that results in accelerated degradation of  
1219 membrane proteins IFITM2 and IFITM3. Loss of IFITM2/3 promotes SARS-CoV-2 entry into  
1220 cells by facilitating fusion between viral membranes and cellular membranes. Illustration created  
1221 with BioRender.com.

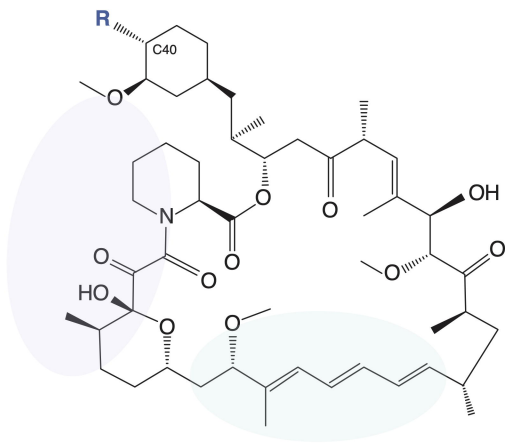

HO Sirolimus (Rapamycin)

HO-CH<sub>2</sub>-CH<sub>2</sub>-O Everolimus

HO-CH<sub>2</sub>-CH(OH)-CH<sub>2</sub>-CO<sub>2</sub>H Temsirolimus

O=P(O)(O)O Ridaforolimus

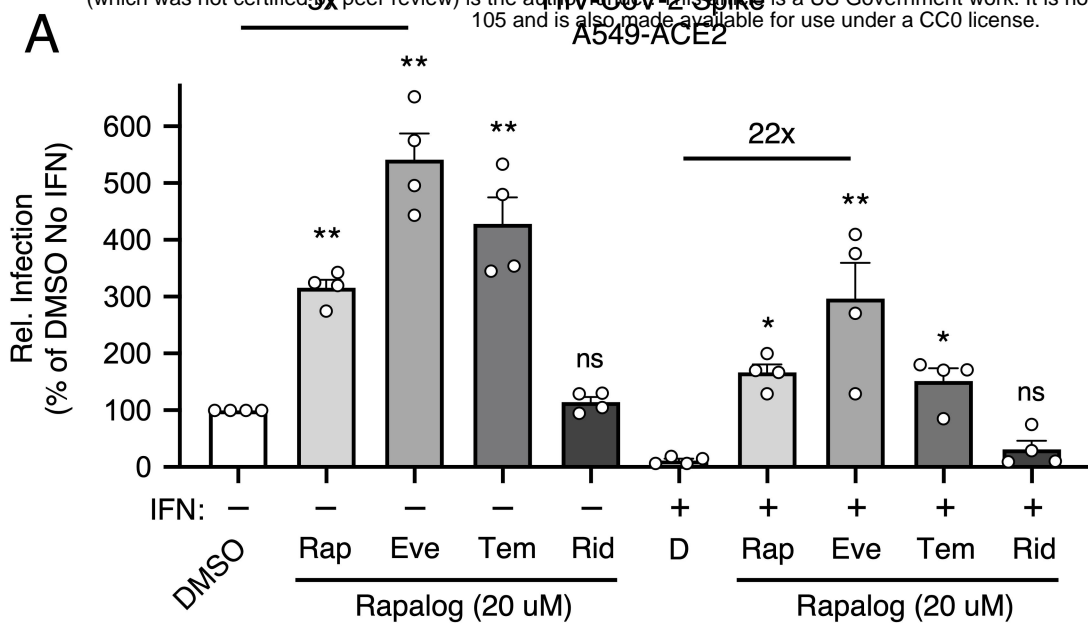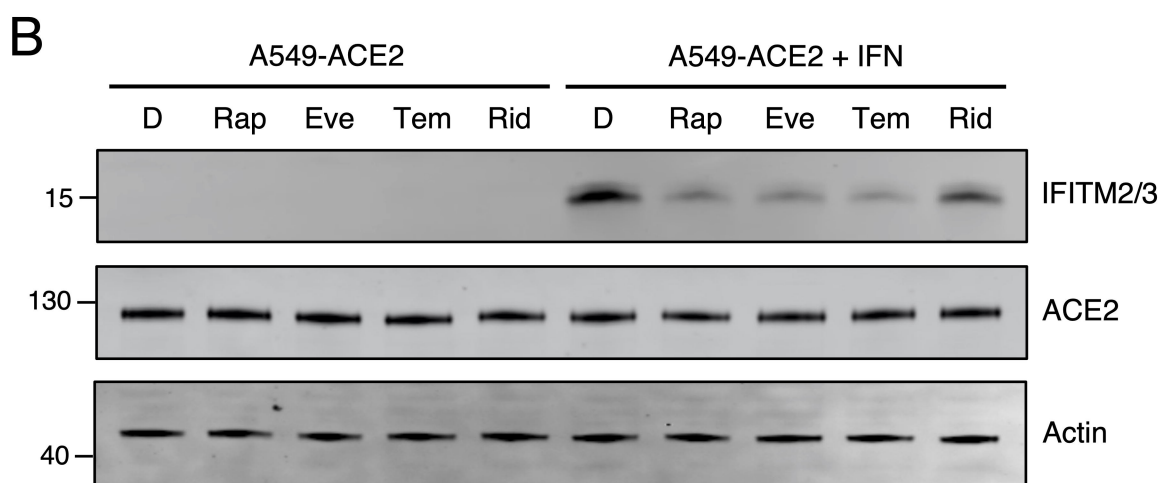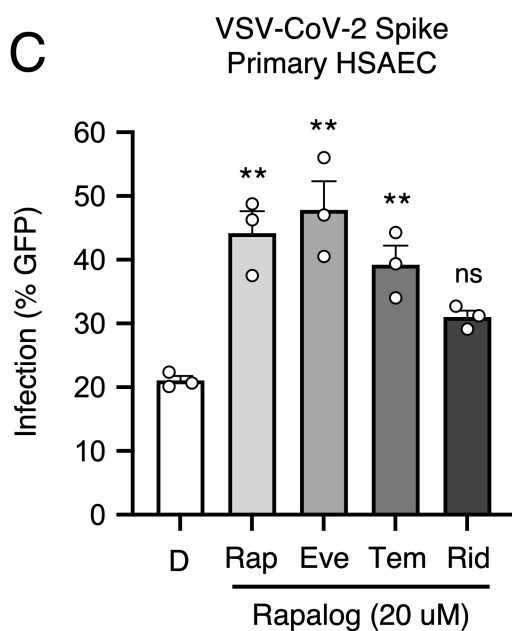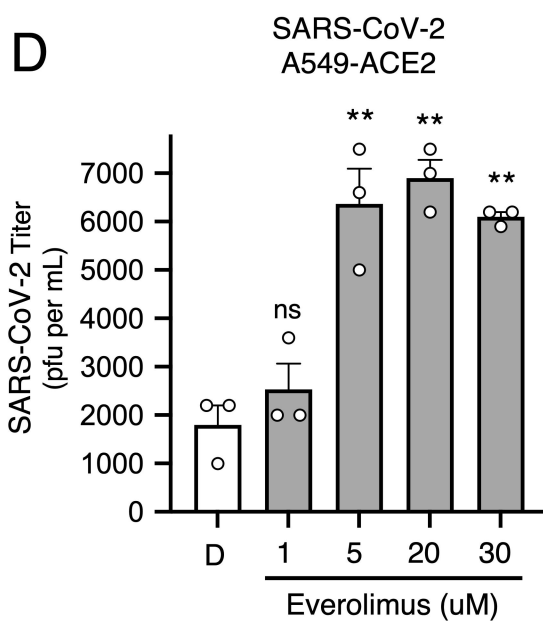

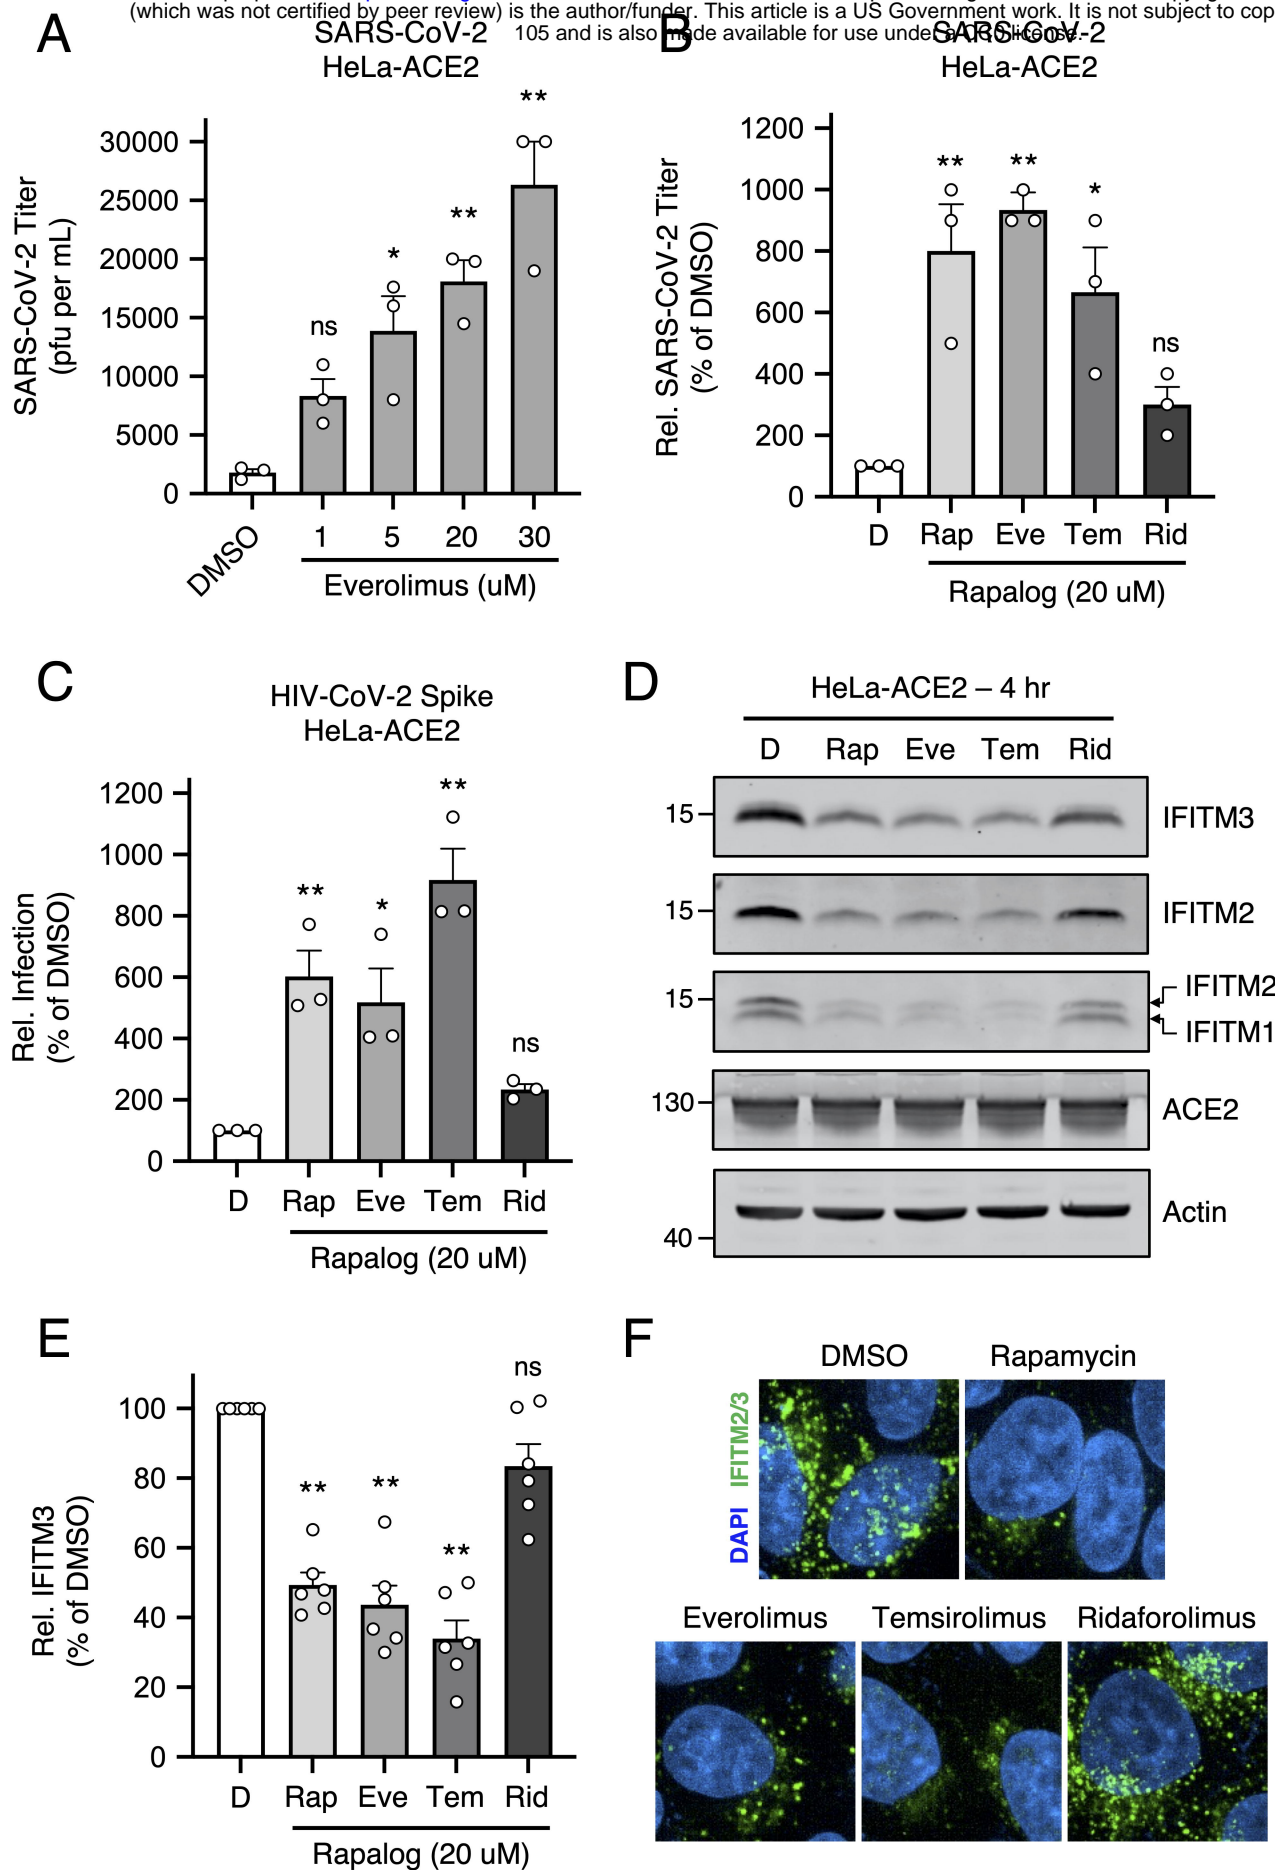

**A**

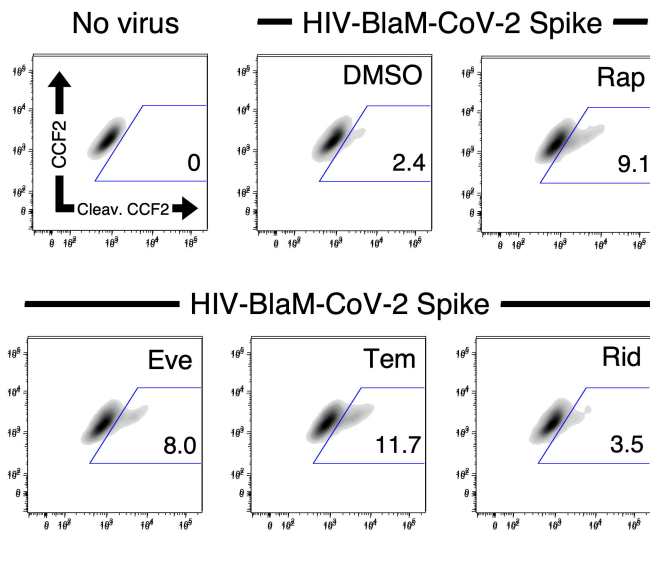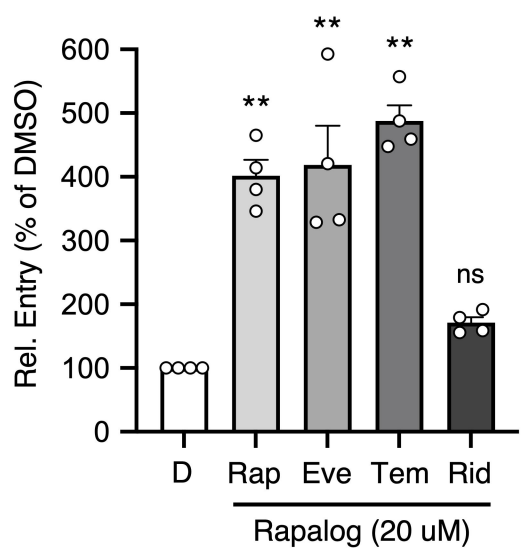

**B**

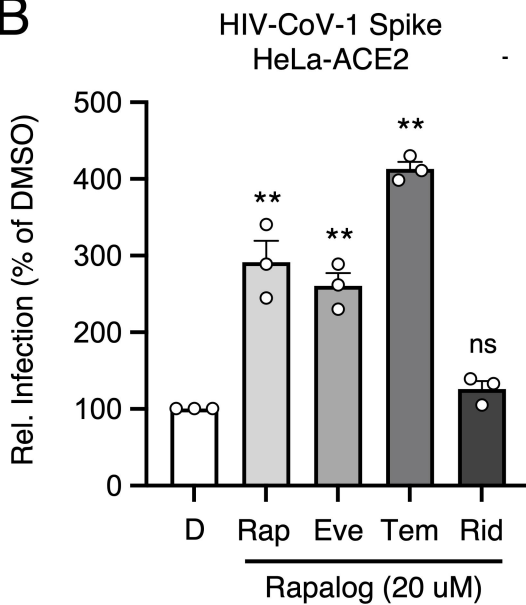

**C**

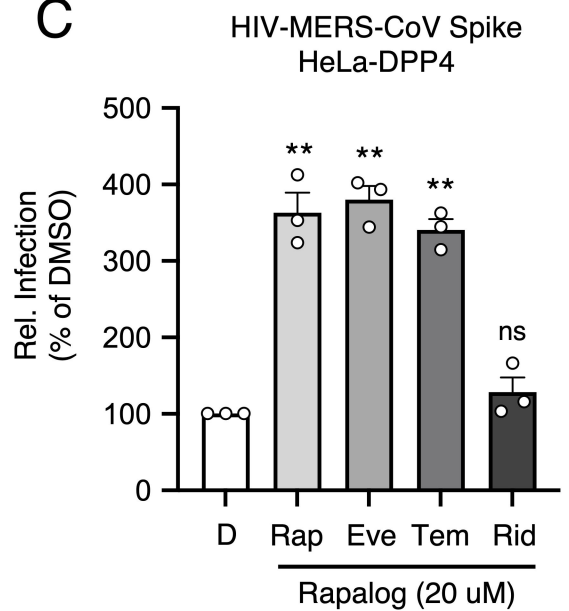

**D**

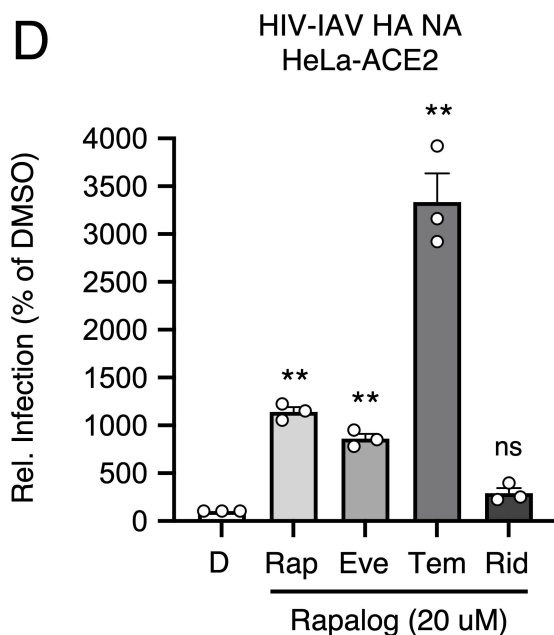

**E**

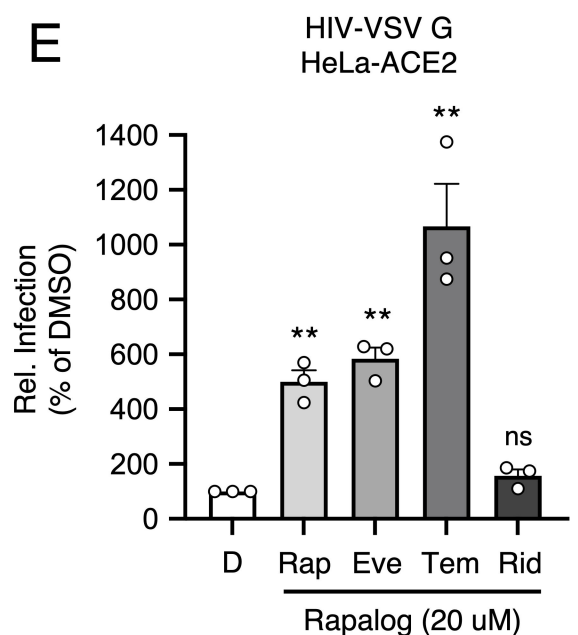

**A**

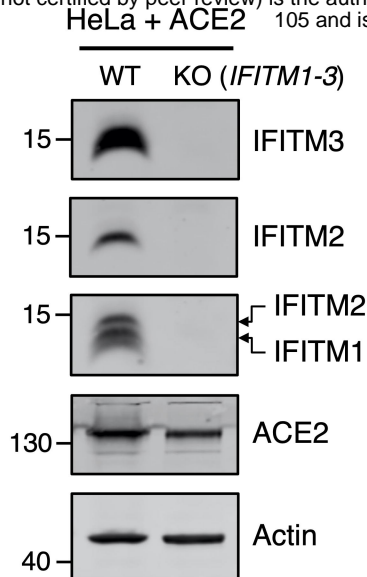

**B**

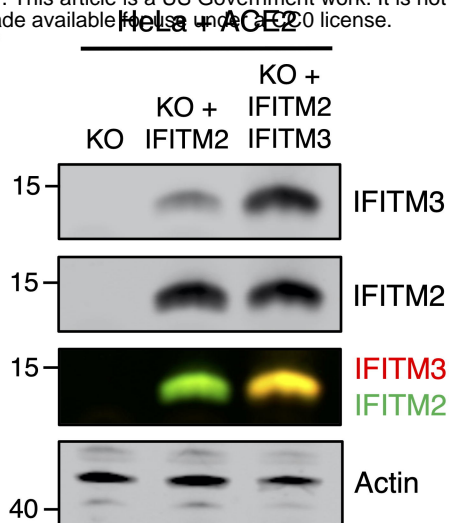

**C**

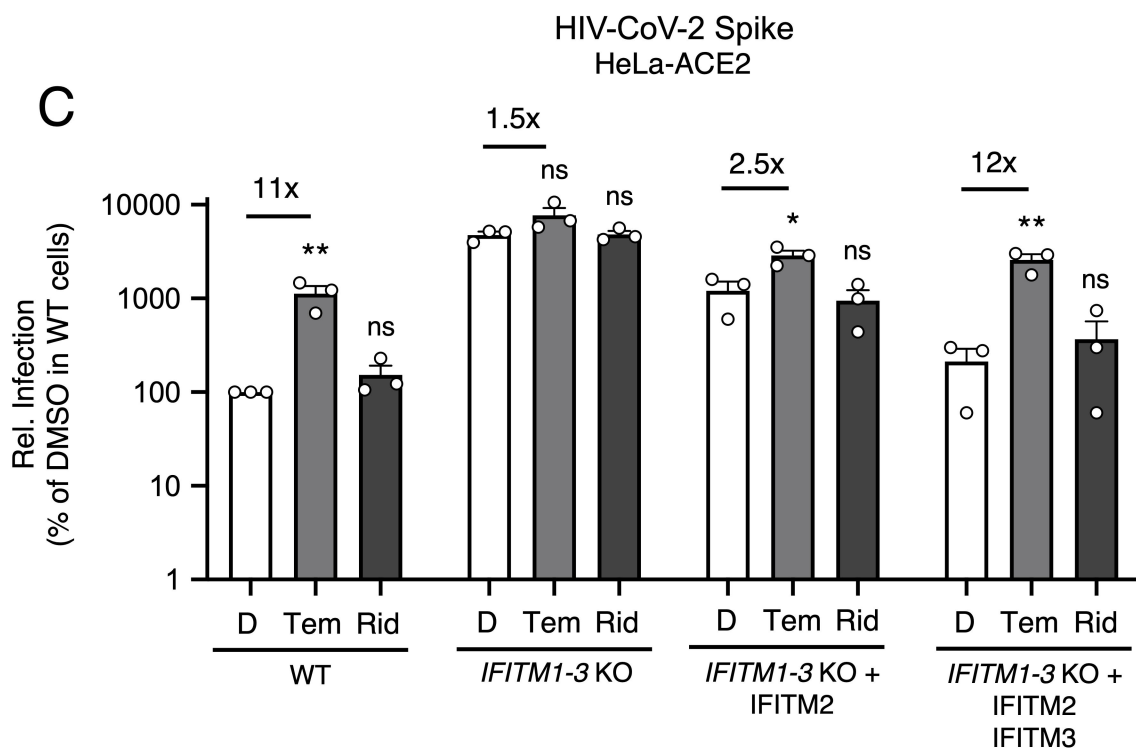

**D**

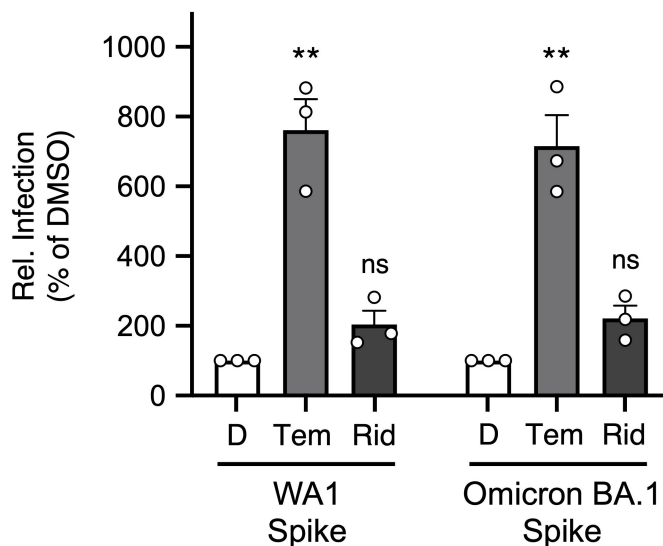



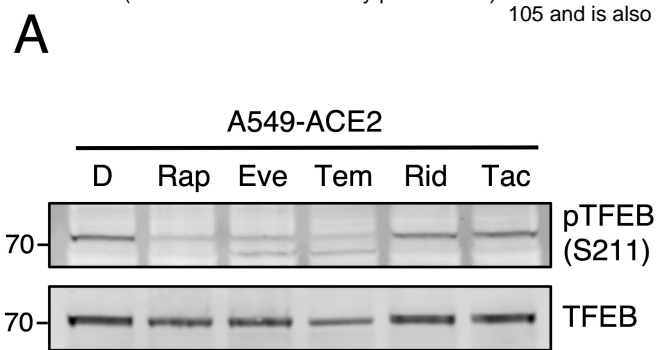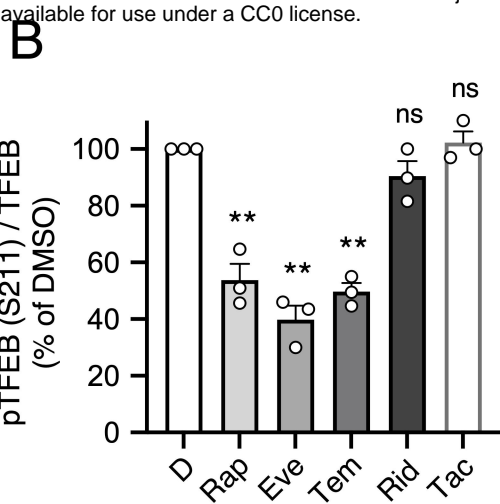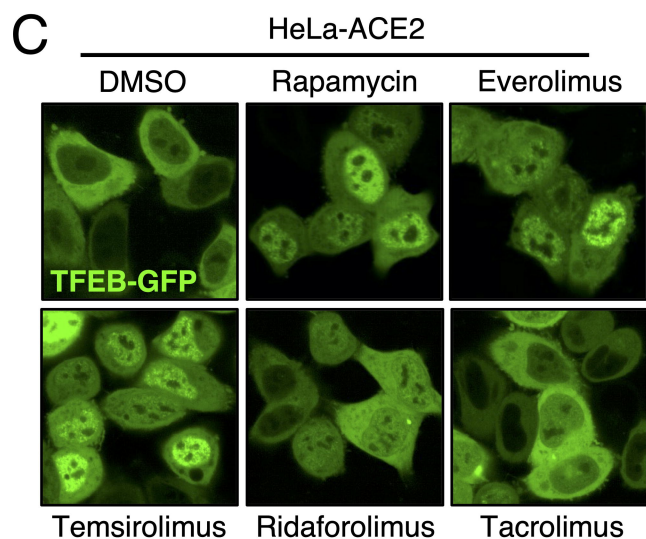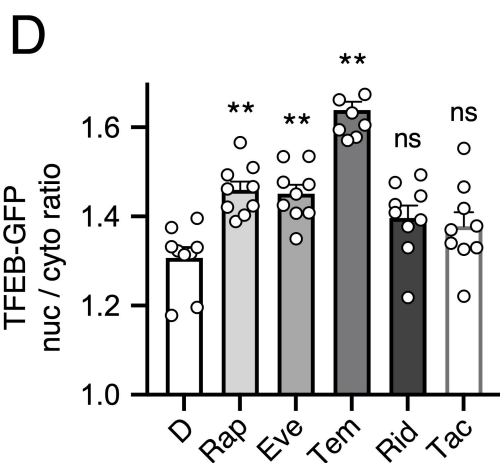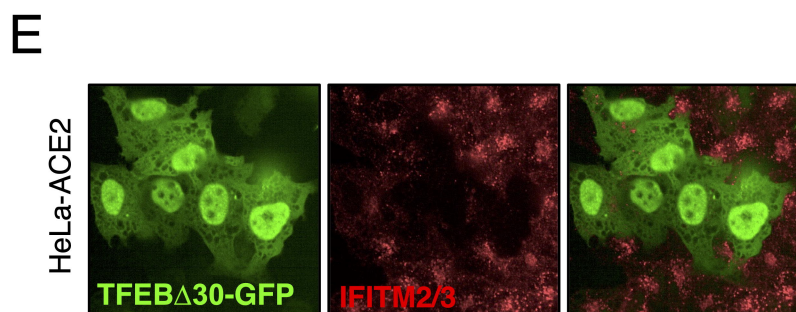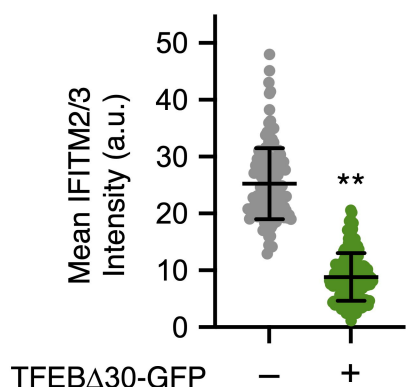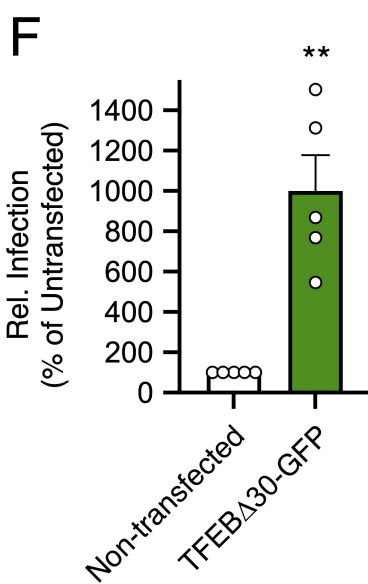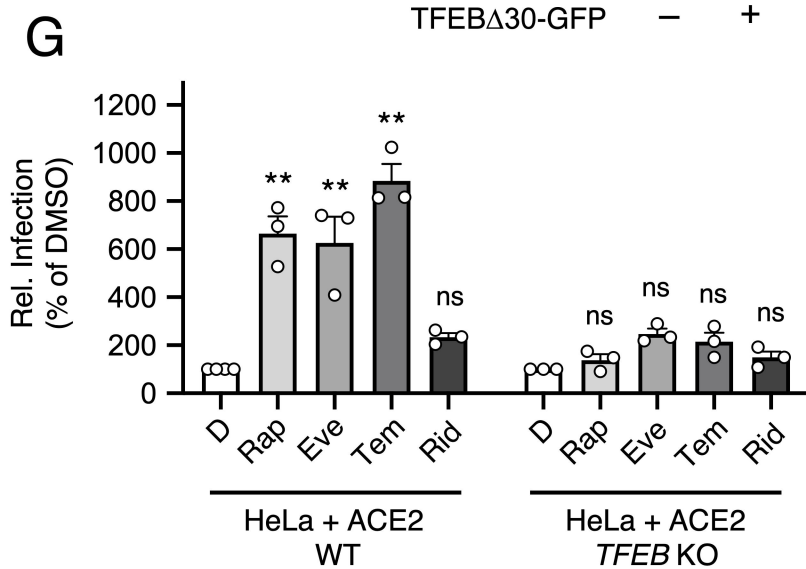

SARS-CoV-2  
Primary hNAEC (ALI)

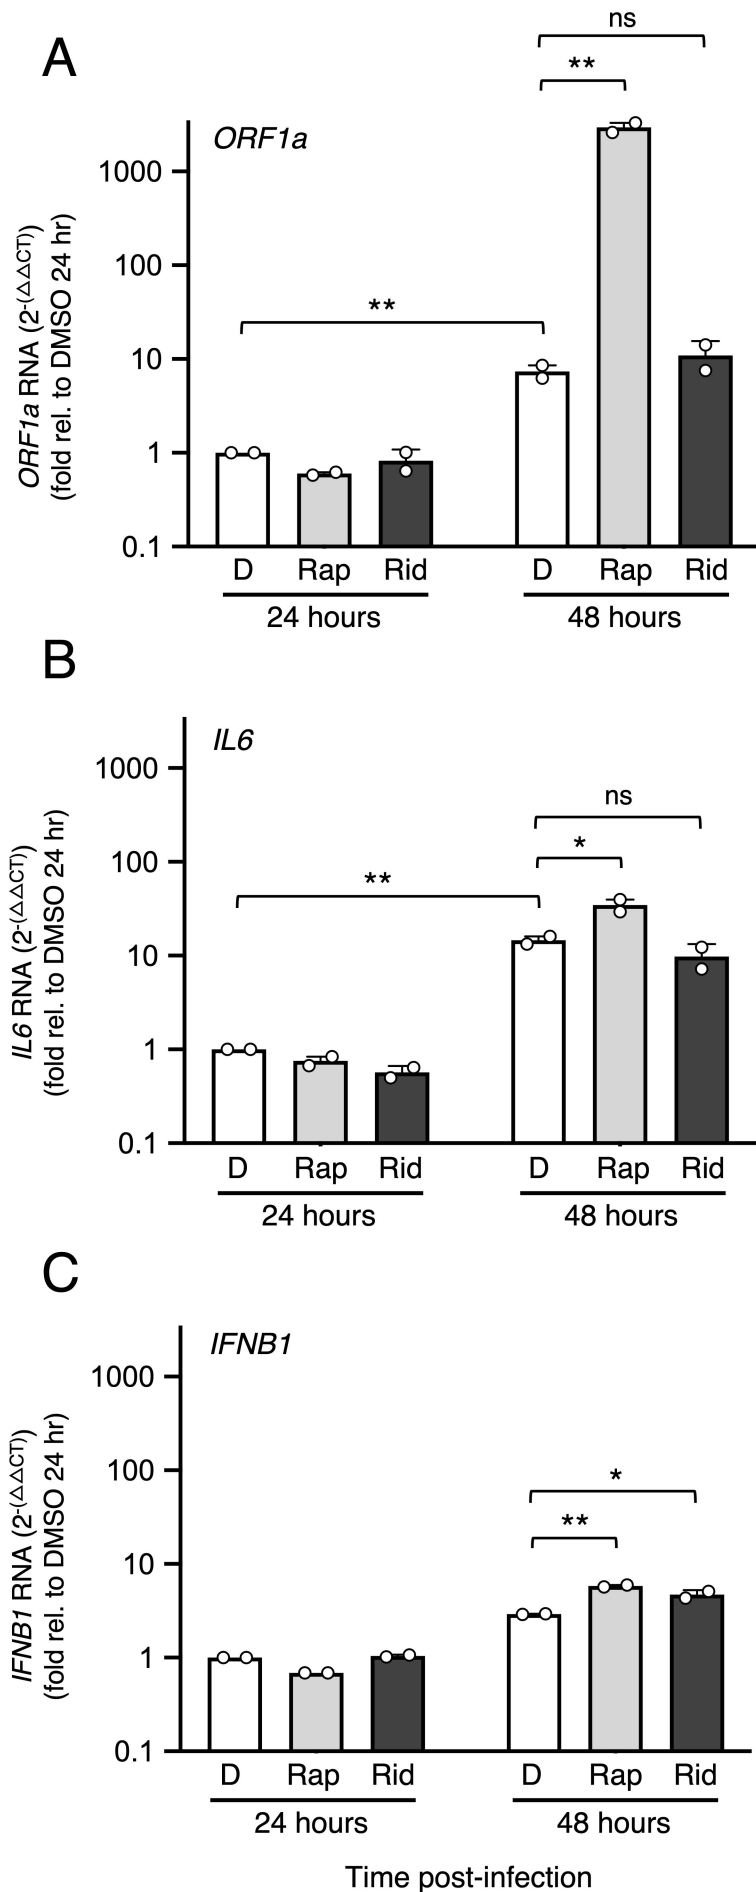

**A**

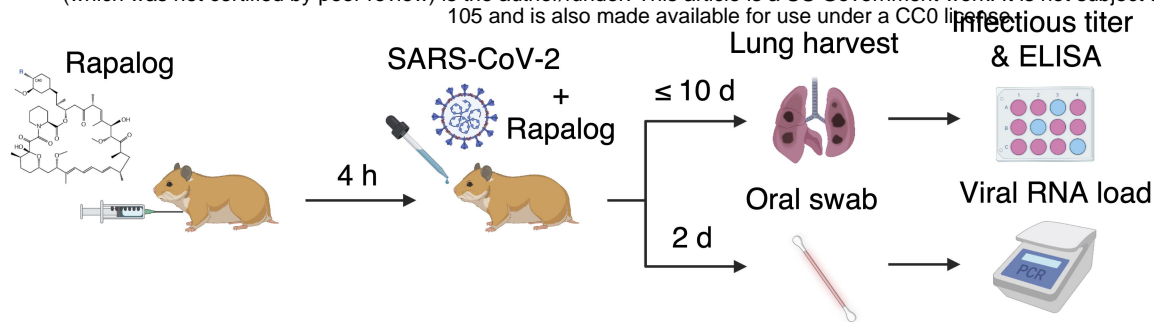

**B**

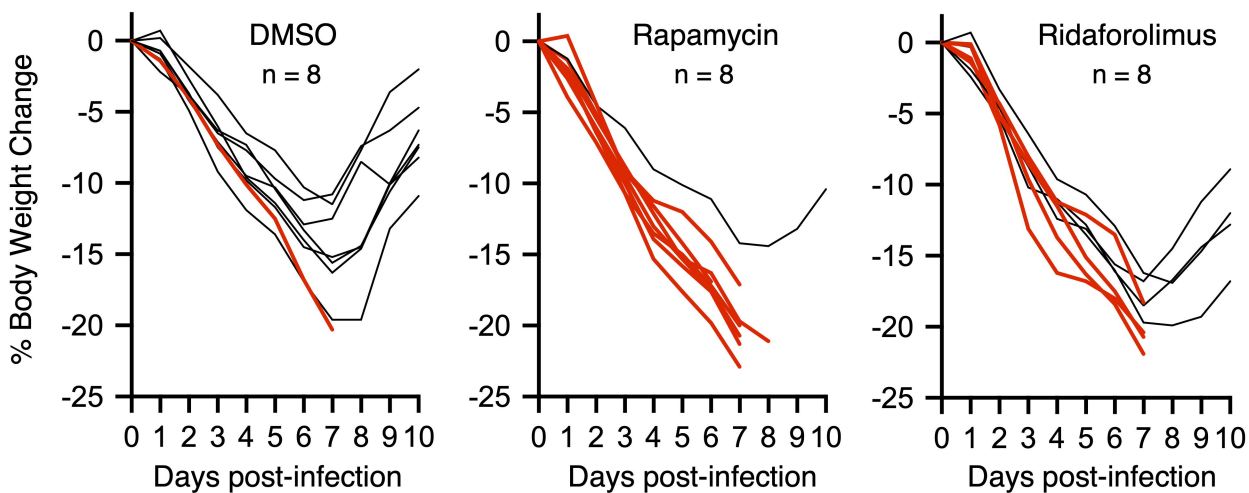

**C**

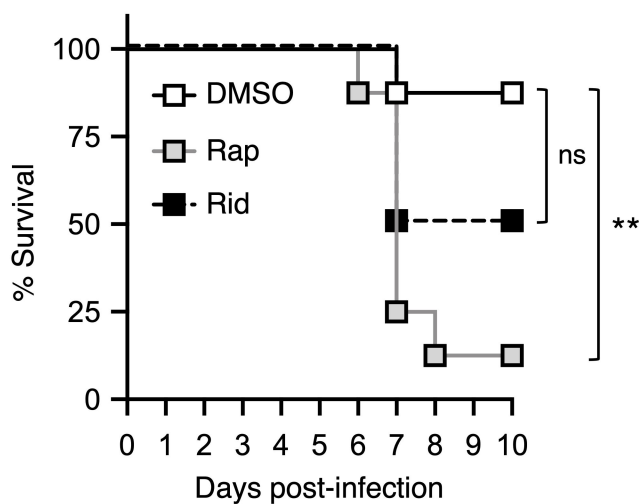

**E**

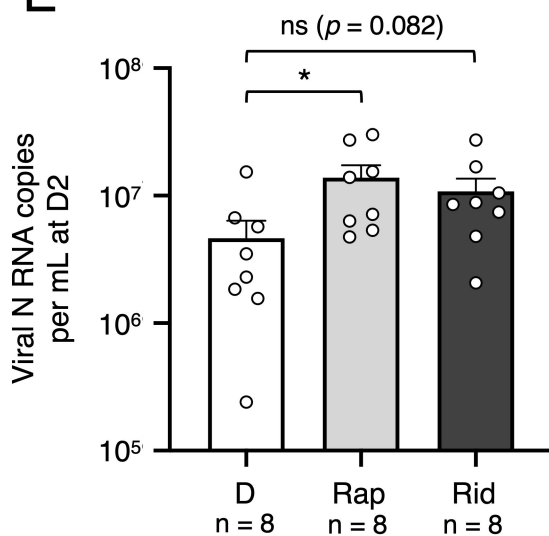

**D**

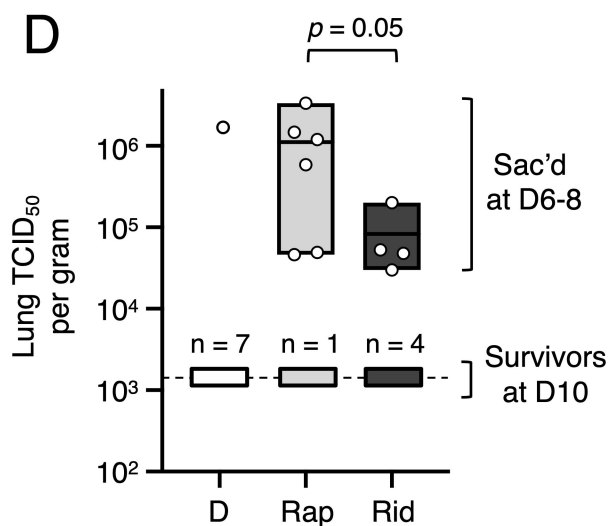

**F**

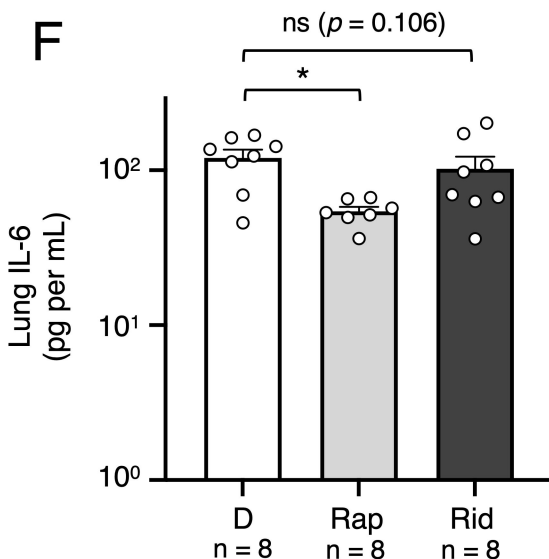

**A**

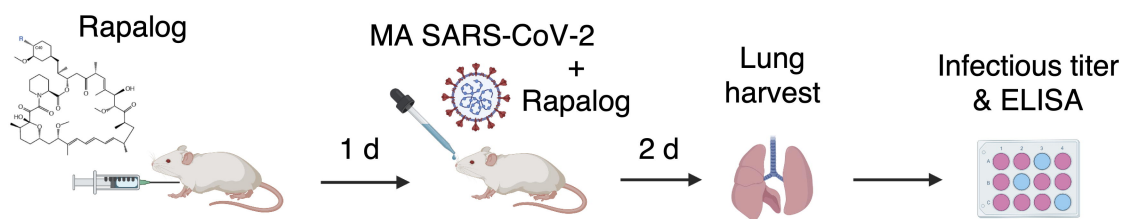

**B**

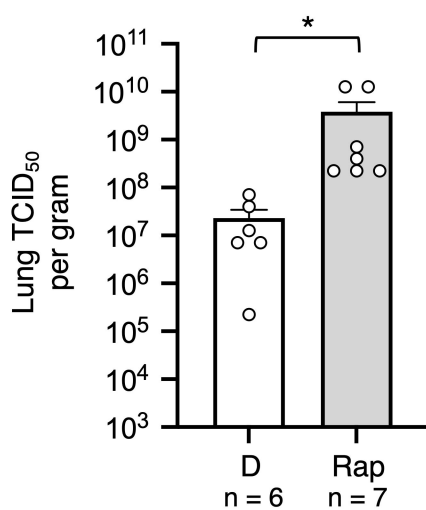

**C**

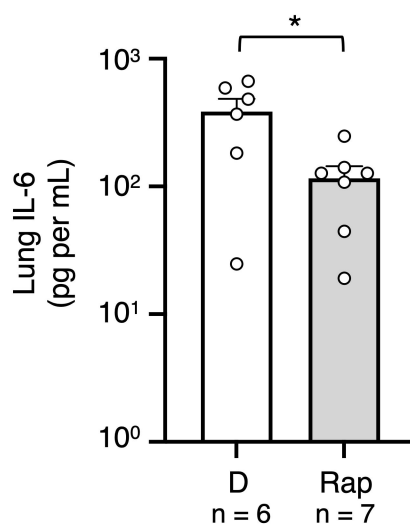

**D**

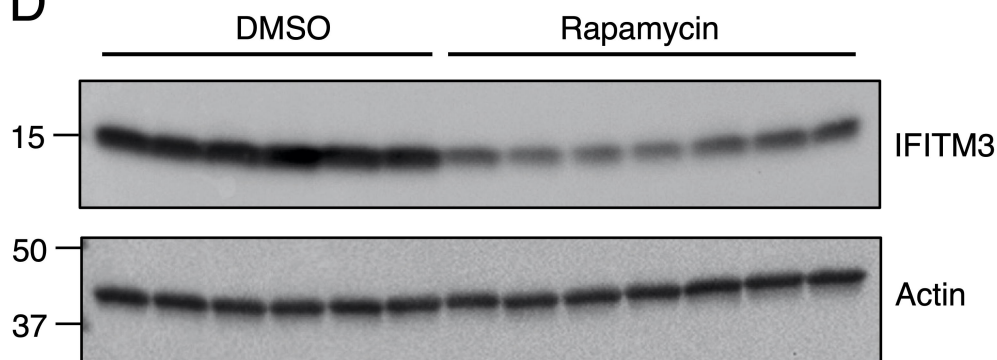

NUCLEUS

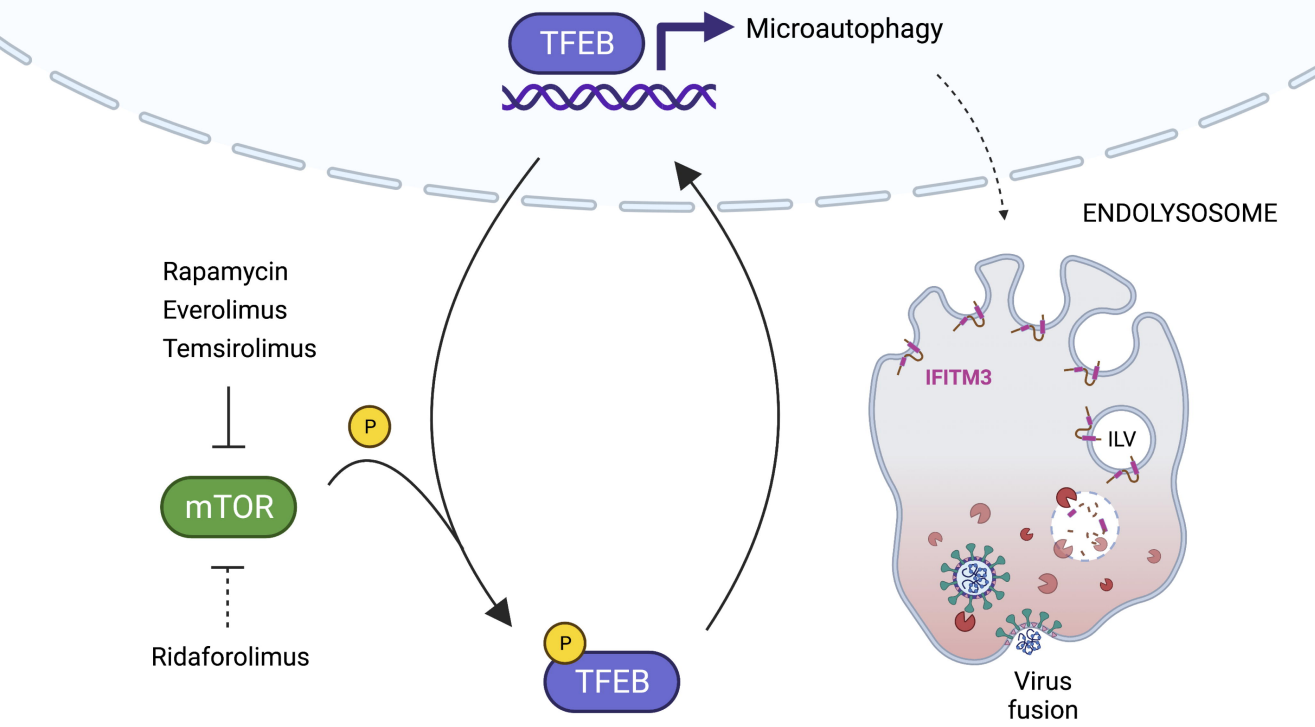

Source: http://biorxiv.org/content/10.1101/2021.04.15.440067v5.full.pdf
